# 1 **Functional SARS-CoV-2-specific immune memory persists after mild COVID-19**

2

## 3 **Authors:**

4 Lauren B. Rodda<sup>1,6</sup>, Jason Netland<sup>1,6</sup>, Laila Shehata<sup>1,7</sup>, Kurt B. Pruner<sup>1,7</sup>, Peter A. Morawski<sup>2,7</sup>,  
5 Chris Thouvenel<sup>3</sup>, Kennedy K. Takehara<sup>1</sup>, Julie Eggenberger<sup>4</sup>, Emily A. Hemann<sup>4</sup>, Hayley R.  
6 Waterman<sup>2</sup>, Mitchell L. Fahning<sup>2</sup>, Yu Chen<sup>3</sup>, Jennifer Rathe<sup>4</sup>, Caleb Stokes<sup>4</sup>, Samuel Wrenn<sup>5</sup>,  
7 Brooke Fiala<sup>5</sup>, Lauren Carter<sup>5</sup>, Jessica A. Hamerman<sup>1,2</sup>, Neil P. King<sup>5</sup>, Michael Gale Jr<sup>4</sup>, Daniel  
8 J. Campbell<sup>1,2</sup>, David Rawlings<sup>1,3</sup>, Marion Pepper<sup>1,8</sup>

9

## 10 **Addresses:**

11 <sup>1</sup>Department of Immunology, University of Washington School of Medicine, Seattle, WA, USA.

12 <sup>2</sup>Center for Fundamental Immunology, Benaroya Research Institute, Seattle, WA, USA.

13 <sup>3</sup>Department of Pediatrics, University of Washington School of Medicine, Seattle, WA and  
14 Center for Immunity and Immunotherapies, Seattle Children's Research Institute, Seattle, WA,  
15 USA.

16 <sup>4</sup>Department of Immunology, Center for Innate Immunity and Immune Disease, University of  
17 Washington, Seattle, WA, USA.

18 <sup>5</sup>Department of Biochemistry, University of Washington, Seattle, WA, USA and Institute for  
19 Protein Design, University of Washington, Seattle, WA, USA.

20 <sup>6</sup>These authors contributed equally.

21 <sup>7</sup>These authors contributed equally.

22 <sup>8</sup>email: [mpepper@uw.edu](mailto:mpepper@uw.edu)

23

24 **Summary:**

25

26 **The recently emerged SARS-CoV-2 virus is currently causing a global pandemic and cases**  
27 **continue to rise. The majority of infected individuals experience mildly symptomatic**  
28 **coronavirus disease 2019 (COVID-19), but it is unknown whether this can induce persistent**  
29 **immune memory that might contribute to herd immunity. Thus, we performed a**  
30 **longitudinal assessment of individuals recovered from mildly symptomatic COVID-19 to**  
31 **determine if they develop and sustain immunological memory against the virus. We found**  
32 **that recovered individuals developed SARS-CoV-2-specific IgG antibody and neutralizing**  
33 **plasma, as well as virus-specific memory B and T cells that not only persisted, but in some**  
34 **cases increased numerically over three months following symptom onset. Furthermore, the**  
35 **SARS-CoV-2-specific memory lymphocytes exhibited characteristics associated with potent**  
36 **antiviral immunity: memory T cells secreted IFN- $\gamma$  and expanded upon antigen re-**  
37 **encounter, while memory B cells expressed receptors capable of neutralizing virus when**  
38 **expressed as antibodies. These findings demonstrate that mild COVID-19 elicits memory**  
39 **lymphocytes that persist and display functional hallmarks associated with antiviral**  
40 **protective immunity.**

41

42 **Main Text:**

43

44 The rapid spread of the SARS-CoV-2 beta coronavirus has infected 19 million and killed over  
45 700,000 people worldwide as of early August 2020. Infection causes the disease COVID-19, which  
46 ranges in presentation from asymptomatic to fatal. However, the vast majority of infected

47 individuals experience mild symptoms that do not require hospitalization<sup>1</sup>. It is critically important  
48 to understand if SARS-CoV-2–infected individuals who recover from mild disease develop  
49 immune memory that protects them from subsequent SARS-CoV-2 infections, thereby reducing  
50 transmission and promoting herd immunity.

51  
52 Immunological memory is predominantly mediated by cells of the adaptive immune system. In  
53 response to most acute viral infections, B and T cells that can bind viral antigens through their  
54 antigen receptors become activated, expand, differentiate and begin secreting effector molecules  
55 to help control the infection. Upon resolution of infection, approximately 90% of these virus-  
56 specific “effector cells” die, while 10% persist as long-lived “memory” cells<sup>2</sup>. Immune memory  
57 cells can produce a continuous supply of effector molecules, as seen with long-lived antibody-  
58 secreting plasma cells (LLPCs). In most cases, however, quiescent memory lymphocytes are  
59 strategically positioned to rapidly reactivate in response to re-infection and execute effector  
60 programs imprinted upon them during the primary response. Upon re-infection, pathogen-specific  
61 memory B cells (MBCs) that express receptors associated with antigen experience and the  
62 transcription factor T-bet rapidly proliferate and differentiate into IgG<sup>+</sup> antibody-secreting  
63 plasmablasts (PBs)<sup>3-5</sup>. Reactivated T-bet–expressing memory CD4<sup>+</sup> T cells proliferate, “help”  
64 activate MBCs and secrete cytokines (including IFN $\gamma$ ) to activate innate cells<sup>2</sup>. Meanwhile,  
65 memory CD8<sup>+</sup> T cells can kill virus-infected cells directly through the delivery of cytolytic  
66 molecules<sup>6</sup>. These quantitatively and qualitatively enhanced virus-specific memory populations  
67 coordinate to quickly clear the virus, thereby preventing disease and reducing the chance of  
68 transmission.

69

70 To infect cells and propagate, SARS-CoV-2 relies on the interaction between the receptor binding  
71 domain (RBD) of its spike protein (S) and angiotensin converting enzyme 2 (ACE2) on host cells<sup>7</sup>.  
72 Multiple studies have shown that the majority of SARS-CoV-2 infected individuals produce S-  
73 and RBD-specific antibodies during the primary response, and RBD-specific monoclonal  
74 antibodies can neutralize the virus *in vitro* and *in vivo*<sup>8-10</sup>. Therefore, RBD-specific antibodies  
75 would likely contribute to protection against re-infection if expressed by LLPCs or MBCs.

76  
77 To determine if the above hallmarks of immune protection from viral infection both form and  
78 persist in individuals that have experienced mild COVID-19, we assessed their SARS-CoV-2-  
79 specific immune responses at one and three months post-symptom onset. Herein we demonstrate  
80 that a multipotent SARS-CoV-2-specific immune memory response forms and is maintained in  
81 recovered individuals at least for the duration of our study. Furthermore, memory lymphocytes  
82 display hallmarks of protective antiviral immunity.

83  
84 ***Return to immune homeostasis after mildly symptomatic COVID-19***

85  
86 To determine if immune memory cells form after mildly symptomatic COVID-19, we collected  
87 plasma and peripheral blood mononuclear cells (PBMCs) from 15 individuals recovered from  
88 COVID-19 (CoV2<sup>+</sup>) (UW IRB 00009810). The CoV2<sup>+</sup> group had a median age of 47 and reported  
89 mild symptoms lasting a median of 13 days (**E.D. Table 1**). The first blood sample (Visit 1) was  
90 drawn at least 20 days after a positive PCR test for SARS-CoV-2 and a median of 35.5 days post-  
91 symptom onset. We expect the primary response to be contracting and early memory populations  
92 to be generated at this time point, as viral load is cleared approximately 8 days post symptom onset

93 <sup>11</sup>. Participants returned for a second blood draw (Visit 2) a median of 86 days post-symptom onset  
94 so we could assess the quantity and quality of the long-lived memory populations (**Fig. 1a**). We  
95 compared these samples to samples collected at two time points representing a similar sampling  
96 interval in a group of 17 healthy controls (HCs). All HCs were considered to have no prior SARS-  
97 CoV-2 infection based on having no detectable plasma SARS-CoV-2 RBD- or S-specific  
98 antibodies above three standard deviations (SDs) of the mean of historical negative (HN) plasma  
99 samples (**E.D. Fig. 1**). We also included HN PBMC samples that were collected prior to the first  
100 human SARS-CoV-2 infection (2016-2019). We included these to control for the possibility that  
101 individuals in the HC group had been infected with SARS-CoV-2 (9/17 described having some  
102 symptoms associated with SARS-CoV-2 infection) despite their lack of detectable RBD-specific  
103 antibodies.

104  
105 Populations of activated innate and adaptive immune cells expand in the blood during the primary  
106 response to SARS-CoV-2 infection<sup>12</sup>. When an acute viral infection is cleared, the majority of  
107 these highly inflammatory cells either die or become quiescent memory cells such that the  
108 proportions and phenotypes of total immune cells are indistinguishable from those seen in pre-  
109 infection blood samples. Consistent with resolution of the primary response, we found no  
110 differences in frequency of total monocytes, monocyte subsets or plasmacytoid dendritic cells  
111 among PBMCs between CoV2<sup>+</sup> and HC individuals (**E.D. Fig. 2**). We also found no differences  
112 in  $\gamma\delta$  or  $\alpha\beta$  CD3<sup>+</sup> T cell frequencies (CD4<sup>+</sup> or CD8<sup>+</sup>), nor in the cell cycle status, expression of  
113 molecules associated with activation, migration, function or proportions of various CD45RA<sup>-</sup>  
114 memory T cell subsets (**E.D. Fig. 3**). Together, these data demonstrate that the inflammatory

115 response associated with acute infection had resolved by the Visit 1 time point and the early  
116 immune memory phase had commenced.

117

### 118 *Mild COVID-19 induces persistent, neutralizing anti-SARS-CoV-2 IgG antibody*

119

120 Humoral immune responses are characterized by a first wave of short-lived, low-affinity antibody-  
121 secreting PBs followed by a subsequent germinal center (GC) response that generates high-affinity  
122 MBCs and antibody-secreting LLPCs. LLPCs can maintain detectable serum antibody titers for  
123 months to many years, depending upon the specific viral infection<sup>13</sup>. Thus, it is critical to  
124 distinguish the first wave of waning PB-derived antibodies from the later wave of persistent LLPC-  
125 derived antibodies that can neutralize subsequent infections, potentially for life. We therefore first  
126 determined that CD19<sup>+</sup>CD20<sup>lo</sup>CD38<sup>hi</sup> PBs were no longer present at elevated frequencies in  
127 CoV2<sup>+</sup> individuals relative to HCs at Visit 1 (**E.D. Fig. 4a**). Other measures of recent B cell  
128 activation in non-PB B cells include increased Ki67 expression (indicating cells have entered the  
129 cell cycle) and expression of T-bet<sup>14</sup>. There are small increases in both the frequencies of Ki67<sup>+</sup>  
130 and T-bet<sup>+</sup> B cells at the Visit 1 time point compared to HC, but not at the Visit 2 time point (**E.D.**  
131 **Fig. 4b,c**). These data suggest that while PBs associated with controlling acute infection are no  
132 longer detectable in CoV2<sup>+</sup> individuals at Visit 1, other B cell fates are still contracting. However,  
133 by Visit 2, these B cell phenotypes have returned to homeostasis (**E.D. Fig. 4a-c**).

134

135 Antibodies measured at Visit 1 might include contributions from short-lived plasmablasts, while  
136 those measured at Visit 2, long after PBs have contracted, represent contributions from LLPCs in  
137 the bone marrow. We therefore examined the SARS-CoV-2-specific IgG, IgM and IgA antibodies

138 at Visit 1 and Visit 2<sup>15</sup>. At Visit 1, 100% of CoV2<sup>+</sup> individuals had plasma anti-RBD IgG levels 3  
139 SDs above the mean of HCs, as measured by ELISA area under the curve (AUC), in accordance  
140 with studies showing 100% seroprevalence by day 14<sup>10</sup> (**Fig. 1b**). Additionally, 93% of CoV2<sup>+</sup>  
141 individuals had anti-RBD IgM and 73% had anti-RBD IgA above this negative threshold. Almost  
142 all CoV2<sup>+</sup> individuals possessed IgG (100%), IgM (100%), and IgA (93%) anti-spike antibodies  
143 above the threshold at Visit 1 as well (**E.D. Fig. 4d**). Levels of anti-RBD and anti-spike binding  
144 were highly correlated for all isotypes (**E.D. Fig. 4e**). At Visit 2, all CoV2<sup>+</sup> individuals maintained  
145 anti-RBD IgG levels above the negative threshold and 71% and 36% had maintained anti-RBD  
146 IgM and IgA, respectively (**Fig. 1b**). Anti-RBD IgG levels decreased only slightly among CoV2<sup>+</sup>  
147 individuals between time points and 36% of CoV2<sup>+</sup> individuals had the same or increased levels  
148 at Visit 2. Anti-RBD IgM and IgA, however, decreased substantially from Visit 1 to Visit 2 (**Fig.**  
149 **1c, E.D. Fig. 4f**).

150  
151 As spike protein, and specifically the RBD, is key for viral entry into the cell, antibodies that target  
152 the RBD can be potent inhibitors of infection<sup>8,9</sup>. To determine whether CoV2<sup>+</sup> individuals form  
153 and maintain neutralizing antibodies, we tested for SARS-CoV-2 neutralization indirectly using a  
154 cell-free competition assay (surrogate virus neutralization test, sVNT) and directly in a plaque  
155 reduction neutralization test (PRNT)<sup>16</sup>. CoV2<sup>+</sup> plasma inhibited RBD binding to ACE2  
156 significantly more than HC plasma by sVNT and RBD inhibition correlated strongly with anti-  
157 RBD IgG levels at both time points (**Fig. 1d,e**). Further, RBD inhibition capacity was maintained  
158 or increased in the majority of CoV2<sup>+</sup> individuals from Visit 1 to Visit 2 (**Fig. 1f, E.D. Fig. 4g**).  
159 Neutralization by PRNT correlated strongly with RBD inhibition at both time points (**Fig. 1g, E.D.**  
160 **4h**) and was similarly maintained between visits (**Fig. 1h**). By the latest time point in our study,

161 86% of CoV2<sup>+</sup> individuals still had better RBD-inhibiting plasma than HCs and 71% had better  
162 neutralizing plasma (measured as above HC mean + 3 SDs). These data are consistent with the  
163 emergence of predominantly IgG<sup>+</sup> RBD and spike-specific LLPCs that maintain detectable  
164 neutralizing anti-SARS-CoV-2 antibody to at least 3 months post-symptom onset.

165

166 *Mild COVID-19 induces a sustained enrichment of RBD-specific memory B cells.*

167

168 The presence of SARS-CoV-2-neutralizing antibodies three months post-symptom onset in CoV2<sup>+</sup>  
169 individuals suggests GC-derived memory LLPCs have formed. GC-derived MBCs also play a  
170 critical role in the formation of antibody secreting cells upon antigen re-exposure. Therefore, we  
171 tested whether SARS-CoV-2-specific MBCs were also formed and maintained in CoV2<sup>+</sup>  
172 individuals throughout the study time course. We generated RBD tetramer reagents and used  
173 enrichment strategies to identify rare RBD-specific cells that are otherwise undetectable in bulk  
174 assessments<sup>17</sup>. We confirmed specificity in RBD immunized mice and then used the RBD-tetramer  
175 to identify, enumerate and phenotype rare, RBD-specific B cells in our HN, HC and CoV2<sup>+</sup>  
176 individuals (**E.D. Fig. 5a,b; Fig. 2a**). Gates used to phenotype RBD-specific B cells were defined  
177 on total B cell populations (**E.D. Fig. 5c**). At Visit 1, RBD-specific B cells were significantly  
178 expanded in CoV2<sup>+</sup> individuals compared to HCs and their numbers were increased further at Visit  
179 2 (**Fig. 2a, b**). The proportion and number of RBD-specific MBCs (defined by CD21 and CD27  
180 expression) in CoV2<sup>+</sup> samples was significantly greater than in HCs and increased from Visit 1 to  
181 Visit 2 (**Fig. 2c,d, E.D. Fig. 5d**). While RBD-specific B cells in HN samples had a similar  
182 proportion of MBCs as in CoV2<sup>+</sup> samples, they contained substantially fewer cells. In addition,  
183 RBD-specific MBCs were largely quiescent with very few expressing Ki67 (**Fig. 2e, E.D. Fig.**



184 switched B cell receptors (BCRs) is another marker of GC-derivation. We therefore assayed BCR  
185 isotype expression on RBD-specific MBCs and found enriched populations of IgA- and IgG-  
186 expressing MBCs in CoV2<sup>+</sup> individuals at both time points (**Fig. 2f-h, E.D. Fig. 5f**). Of note, while  
187 small numbers of RBD-specific MBCs were detected in controls, these cells were predominantly  
188 unswitched (IgM<sup>+</sup> and IgD<sup>+</sup>), suggesting they may represent cross-reactive MBCs possibly  
189 generated in response to one of the human coronaviruses that cause 15% of common colds<sup>18-20</sup>.

190  
191 An additional measure of antiviral MBC function is the graded expression of T-bet<sup>14</sup>. MBCs that  
192 express low-levels of T-bet are associated with rapid differentiation into secondary PBs that  
193 produce high affinity, viral-specific antibodies during a secondary infection<sup>21</sup>. We found a higher  
194 proportion and number of T-bet<sup>+</sup>, and specifically T-bet<sup>lo</sup>, RBD-specific MBCs in CoV2<sup>+</sup>  
195 individuals compared with HCs at Visit 1 and the higher numbers were maintained at Visit 2 (**Fig.**  
196 **2i-k, E.D. Fig. 5g,h**). T-bet<sup>hi</sup> MBCs are considered to be recently activated and often found  
197 enriched during chronic infection<sup>21</sup>. Consistent with SARS-CoV-2 being an acute infection<sup>11</sup>, we  
198 found very few RBD-specific T-bet<sup>hi</sup> MBCs in CoV2<sup>+</sup> individuals at either memory time point  
199 (**E.D. Fig. 5i**). Our data demonstrate that SARS-CoV-2 infection induces the generation of RBD-  
200 specific Tbet<sup>lo</sup>IgG<sup>+</sup>CD21<sup>+</sup>CD27<sup>+</sup> “classical” MBCs likely derived from a GC<sup>22</sup>. Furthermore,  
201 numbers of these MBCs were not only maintained, but increased from one to three months post-  
202 symptom onset.

203

204 *SARS-CoV-2 infection induces durable, functional spike-reactive CD4<sup>+</sup> T cells*

205

206 The presence of T-bet<sup>+</sup> RBD-specific MBCs suggested that antigen-specific memory T cell  
207 responses were also likely to be elicited in CoV2<sup>+</sup> individuals. To enumerate SARS-CoV-2-  
208 specific memory T cells, total PBMCs from control or CoV2<sup>+</sup> individuals were incubated with  
209 spike protein and expression of activation markers was assessed (**Fig. 3a**)<sup>23,24</sup>. PBMCs from CoV2<sup>+</sup>  
210 individuals at Visit 1 and 2 displayed robust re-activation of spike-specific CD4<sup>+</sup> memory T  
211 responses, as measured by increased expression of ICOS and CD40L (two molecules associated  
212 with B cell help upon re-activation), while PBMCs from HC and HN individuals did not (**Fig.**  
213 **3a,b**). There were no significant differences in the numbers of responding cells in CoV2<sup>+</sup>  
214 individuals between the two visits, suggesting spike-specific memory CD4<sup>+</sup> T cells were  
215 maintained throughout the study (**Fig. 3b**). Furthermore, greater numbers of CXCR5-expressing  
216 circulating T follicular helper (cTfh) cells<sup>25</sup>, which provide B cell help, were found within the  
217 population of S-specific ICOS<sup>+</sup>CD40L<sup>+</sup>CD4<sup>+</sup> cells in CoV2<sup>+</sup> individuals than in healthy controls  
218 at both visits (**Fig. 3c**). Together these data suggest that SARS-CoV-2-specific memory CD4<sup>+</sup> T  
219 cells maintain the capacity to provide B cell help even at three months post-symptom onset.

220  
221 Memory CD4<sup>+</sup> T cells produce cytokines within hours of activation, whereas naive T cells take  
222 days<sup>26</sup>. We first examined cytokine production from activated CD4<sup>+</sup> memory CXCR5<sup>-</sup> non-Tfh  
223 cells and CXCR5<sup>+</sup> cTfh cells identified in the assay above (**Fig. 3b**). S-specific CCR6<sup>+</sup>CXCR5<sup>+</sup>  
224 cTfh cells, associated with IL-17 production, and a smaller population of CXCR3<sup>+</sup>CXCR5<sup>+</sup> cTfh  
225 cells, associated with IFN $\gamma$  production, were recently described in a predominantly mild to  
226 moderate cohort 30 days post symptom onset<sup>27</sup>. We therefore analyzed activated ICOS<sup>+</sup>CD69<sup>+</sup> S-  
227 specific cells for expression of CCR6 and CXCR5 and then cytokine expression was examined in  
228 each population based on gating on a PMA positive control (**Fig 3d, E.F. 6a**). Although multiple

229 cytokines associated with Tfh function were assessed, only IFN $\gamma$ , IL-17 and IL-2 cytokine  
230 producing cells were significantly expressed in activated S-specific memory CD4<sup>+</sup> cells in CoV2<sup>+</sup>  
231 individuals compared to HCs (**Fig. 3d-f**). Small numbers of S-specific cells were measured in HCs  
232 after stimulation compared to vehicle alone that reflect previously described S-specific cross-  
233 reactivity<sup>20,28</sup>, but far greater responses were seen in the CoV2<sup>+</sup> individuals (**Fig. 3e**). Three months  
234 post symptom onset we found a higher frequency of CCR6<sup>-</sup> cTfh cells that produced Th1 cytokines,  
235 IFN $\gamma$  and IL-2, suggesting a dominant Th1 response in CoV2<sup>+</sup> individuals (**Fig. 3f**).

236  
237 To further define the types of antigen-specific CD4<sup>+</sup> memory T cells in CoV2<sup>+</sup> individuals without  
238 relying on secretion of specific cytokines, we assessed memory CD4<sup>+</sup> T cell proliferation in  
239 response to spike restimulation. For this, we sorted CD45RA<sup>+</sup> naive, CD45RA<sup>-</sup>CCR7<sup>+</sup> central  
240 memory (Tcm) and CD45RA<sup>-</sup>CCR7<sup>-</sup> effector memory (Tem) T cells from HC or CoV2<sup>+</sup>  
241 individuals (**E.D. Fig. 6b**), then measured the proliferative capacity of each sorted population  
242 following culture with autologous CD14<sup>+</sup> monocytes and recombinant spike protein (**Fig. 3g, h**;  
243 **E.D. Fig 6c**). Only Tcm cells from CoV2<sup>+</sup> individuals taken at both Visit 1 and Visit 2 displayed  
244 significant proliferation frequencies compared to HC samples, although substantial proliferative  
245 responses by Tem cells were observed in some CoV2<sup>+</sup> individuals (**Fig. 3h**). We also examined  
246 the expression of CXCR3 and CCR6 on S-specific, proliferated memory cells and found that the  
247 majority of cells that had proliferated, as measured by the dilution of cell proliferation dye (CPD<sup>lo</sup>)  
248 expressed CXCR3, in keeping with Type 1 cytokine production in the previous assay. Spike-  
249 specific Tcm, and potentially Tem, are therefore maintained throughout our study and have the  
250 ability to proliferate and re-populate the memory pool upon antigen re-encounter.

251

252 While much recent work has focused on antibodies and B cells, memory CD8<sup>+</sup> T cells are uniquely  
253 positioned to kill virus infected cells through their directed expression of cytokines and cytolytic  
254 molecules. S-specific memory CD8<sup>+</sup> T cells that persisted for three months after mild COVID-19  
255 disease could be identified by expression of the activation marker CD69 and the cytokine IFN $\gamma$   
256 after overnight stimulation with spike (**Fig 3i**). Unlike CD4<sup>+</sup> memory T cells, activated cytokine-  
257 expressing CD8<sup>+</sup> T cells were significantly increased over vehicle controls in both control and  
258 CoV2<sup>+</sup> groups (**Fig. 3j**). Together, these data demonstrate that both CD4<sup>+</sup> and CD8<sup>+</sup> SARS-CoV-  
259 2-specific memory T cells are maintained and are able to produce effector cytokines after  
260 restimulation three months post-symptom onset in mildly symptomatic COVID-19 individuals.

261

#### 262 *Mild COVID-19-induced SARS-CoV-2-specific MBCs can express neutralizing antibodies*

263

264 Since SARS-CoV-2 RBD-specific MBC and S-specific CD4<sup>+</sup> cTfh were enriched in CoV2<sup>+</sup>  
265 individuals after 3 months, we assessed whether these MBCs could produce neutralizing antibodies  
266 if they were reactivated by a secondary infection. To this end, we index sorted single RBD-specific  
267 B cells and sequenced the BCRs from 3 CoV2<sup>+</sup> individuals at Visit 1 (**E.D. Fig. 7a**). Of the class-  
268 switched (IgG<sup>+</sup>) RBD-specific classical MBCs (CD21<sup>+</sup>CD27<sup>+</sup>) we sorted, we randomly selected 7  
269 to be cloned and expressed as IgG1 monoclonal antibodies (**Fig 4a**). This set of antibodies utilized  
270 a wide variety of heavy and light chains, had all undergone somatic hypermutation and were all  
271 unique clones (**Fig. 4b, E.D. Table 2**). These antibodies were first expressed in small scale  
272 cultures. Transfection supernatants were assessed for antibody expression by IgG ELISA (**E.D.**  
273 **Fig 7b**) and specificity by RBD ELISA where all 7 showed strong binding to RBD (**Fig. 4c**). The  
274 first 4 antibodies cloned were expressed on a larger scale and purified. The specificity of these

275 purified antibodies for RBD was again confirmed by ELISA (**E.D. Fig. 7c**) and their ability to  
276 prevent SARS-CoV-2 infection was tested via PRNT assay. Two of the four tested (#202 and 203)  
277 showed strong virus neutralization (**Fig. 4d**), with IC<sub>50</sub> values of 15.6 and 15.4 ng/ml respectively  
278 (**Fig. 4e**). This was comparable to a previously published strongly neutralizing mouse antibody  
279 (B04) which was included as a positive control (IC<sub>50</sub>= 3.6 ng/ml)<sup>29</sup>. Two of the RBD-specific  
280 antibodies were unable to inhibit virus infection, similar to a non-neutralizing mouse antibody  
281 (C02) and an irrelevant *Plasmodium*-specific human antibody. Three more monoclonal antibodies  
282 in addition to the 4 above were assessed for their capacity to inhibit RBD binding to the ACE2  
283 receptor by sVNT assay (**Fig. 4f**). Three of the seven were able to inhibit RBD binding to ACE2,  
284 similarly to a strongly neutralizing alpaca nanobody<sup>30</sup>. Interestingly, #203, which neutralized live  
285 virus, did not inhibit binding in this assay, while #202 both inhibited binding and neutralized the  
286 virus. Overall 50% of the antibodies tested showed inhibitory activity by one or both of these  
287 methods. Thus, RBD-specific MBCs induced by SARS-CoV-2 infection are capable of producing  
288 neutralizing antibodies against the virus and could thus contribute to protection from a second  
289 exposure to SARS-CoV-2.

290

## 291 ***Discussion***

292

293 In the absence of a vaccine, natural infection-induced herd immunity could play a key role in  
294 reducing infections and deaths. For this to be possible, individuals that experience mild COVID-  
295 19 would need to develop and sustain protective immune memory. Here, we found that individuals  
296 that recovered from mildly symptomatic COVID-19 had an expanded arsenal of SARS-CoV-2-  
297 specific immune mediators: neutralizing antibodies, IgG<sup>+</sup>T-bet<sup>lo</sup> classical MBCs, circulating

298 cytokine-producing CXCR5<sup>+</sup> Tfh1 cells, proliferating CXCR3<sup>+</sup> CD4<sup>+</sup> memory cells and IFN $\gamma$   
299 producing CD8<sup>+</sup> T cells that were maintained to at least three months post-symptom onset. This  
300 study predicts that these recovered individuals will be protected from a second SARS-CoV-2  
301 infection and, if so, suggests that Th1 memory should be the target of vaccine elicited memory.

302  
303 Although long-lived immune memory can form to most viruses, some studies examining the  
304 longevity of the response to coronaviruses have suggested that this is not the case<sup>31-33</sup>. However,  
305 more recent studies, including our own, have examined memory time points when only LLPCs,  
306 and not short-lived PBs, are producing circulating antibodies. Our study, along with three others  
307 clearly demonstrates elevated IgG<sup>+</sup> RBD-specific plasma antibodies and neutralizing plasma are  
308 generated and maintained for at least 3 months post-SARS-CoV-2 infection<sup>34-36</sup>.

309  
310 While antibodies reveal the contributions of LLPCs, functional virus-specific memory B and T  
311 cells can also be key to protective immune memory<sup>37</sup>. Although previous studies have measured  
312 the emergence of SARS-CoV-2-specific MBCs within a month of infection<sup>27,38</sup>, we characterized  
313 SARS-CoV-2-specific MBCs at one and three months from symptom onset. Our study revealed a  
314 prominent population of RBD-specific IgG<sup>+</sup>CD27<sup>+</sup>CD21<sup>+</sup>T-bet<sup>lo</sup> MBCs, which has been  
315 associated in other infections with rapid differentiation into antibody-secreting PBs upon re-  
316 exposure<sup>5</sup>, effective antiviral responses<sup>39</sup> and long-lived protection<sup>3</sup>. Furthermore, we found some  
317 of the RBD-specific MBCs at Visit 1 expressed BCRs capable of neutralizing the virus when  
318 expressed as antibodies. Since the numbers of these IgG<sup>+</sup> RBD-specific MBCs were not only  
319 sustained, but continued to increase between one and three months, we predict they are GC-  
320 derived. Thus, MBCs at three months would have undergone increased affinity maturation and we

321 would expect an even higher percentage will be capable of producing neutralizing RBD-specific  
322 antibodies upon re-infection.

323

324 MBC reactivation requires interactions with memory CD4<sup>+</sup> T cells, which reactivate MBCs  
325 through their expression of key molecules associated with T-B interactions including CXCR5,  
326 ICOS, CD40 and a variety of cytokines. SARS-CoV-2-specific CD4<sup>+</sup> memory T cells in recovered  
327 individuals exhibited the capacity to express all of these molecules and to undergo robust  
328 proliferation upon re-exposure to spike protein. Notably, S-specific CD4<sup>+</sup> memory T cells from  
329 CoV2<sup>+</sup> individuals rapidly displayed increased levels of ICOS and CD40L on CXCR5<sup>+</sup> and  
330 CXCR5<sup>-</sup> cells after stimulation as well as expression of Th1- and Th17- associated cytokines.  
331 These results are consistent with another recent report of SARS-CoV-2- specific cTfh cells<sup>27</sup>,  
332 although they detected a high frequency of Th17-like cTfh cells, which could be due to the earlier  
333 time point they were examining as Th17 cells can develop into Th1 cells late in an immune  
334 response<sup>40</sup>. The expression of IFN $\gamma$  and IL-17 by these cells is notable as these cytokines are  
335 associated with class-switching to IgG and IgA isotypes, respectively<sup>41,42</sup>. We also found cross-  
336 reactive memory B and T cells in healthy controls, as has been previously noted<sup>43</sup>. It is difficult to  
337 measure their contribution to the expanded populations of SARS-CoV-2-specific cells we found  
338 in our CoV2<sup>+</sup> cohorts, and therefore impossible to evaluate their protective capacity. However, we  
339 can conclude that mild COVID-19 induces an expanded population of functionally diverse  
340 memory lymphocytes compared to the cross-reactive pool present in our controls.

341

342 Studies of reinfection have yet to be done in humans, but macaques infected with SARS-CoV-2  
343 were protected from rechallenge<sup>44</sup>. This further suggests that the immune memory induced by mild

344 COVID-19 that we observed will be protective. While additional studies are needed to understand  
345 variability of responses in a larger cohort and to determine how long memory to SARS-CoV-2  
346 infection is truly maintained, our work suggests that mild COVID-19 induces persistent immune  
347 memory poised for a coordinated, protective response to re-exposure that could contribute to herd  
348 immunity and curtailing this pandemic.



349 **Main References:**

- 350 1 Wu, Z. & McGoogan, J. M. Characteristics of and Important Lessons From the  
351 Coronavirus Disease 2019 (COVID-19) Outbreak in China: Summary of a Report of  
352 72 314 Cases From the Chinese Center for Disease Control and Prevention. *JAMA* **323**,  
353 1239-1242, doi:10.1001/jama.2020.2648 (2020).
- 354 2 Ruterbusch, M., Pruner, K. B., Shehata, L. & Pepper, M. In Vivo CD4(+) T Cell  
355 Differentiation and Function: Revisiting the Th1/Th2 Paradigm. *Annu Rev Immunol* **38**,  
356 705-725, doi:10.1146/annurev-immunol-103019-085803 (2020).
- 357 3 Knox, J. J., Myles, A. & Cancro, M. P. T-bet(+) memory B cells: Generation, function, and  
358 fate. *Immunol Rev* **288**, 149-160, doi:10.1111/imr.12736 (2019).
- 359 4 Kim, C. C., Baccarella, A. M., Bayat, A., Pepper, M. & Fontana, M. F. FCRL5(+) Memory  
360 B Cells Exhibit Robust Recall Responses. *Cell Rep* **27**, 1446-1460 e1444,  
361 doi:10.1016/j.celrep.2019.04.019 (2019).
- 362 5 Nellore, A. *et al.* Fcrl5 and T-bet define influenza-specific memory B cells that predict  
363 long-lived antibody responses. *bioRxiv*, 643973, doi:10.1101/643973 (2019).
- 364 6 Schmidt, M. E. & Varga, S. M. The CD8 T Cell Response to Respiratory Virus Infections.  
365 *Frontiers in Immunology* **9**, doi:10.3389/fimmu.2018.00678 (2018).
- 366 7 Hoffmann, M. *et al.* SARS-CoV-2 Cell Entry Depends on ACE2 and TMPRSS2 and Is  
367 Blocked by a Clinically Proven Protease Inhibitor. *Cell* **181**, 271-280 e278,  
368 doi:10.1016/j.cell.2020.02.052 (2020).
- 369 8 Shi, R. *et al.* A human neutralizing antibody targets the receptor binding site of SARS-  
370 CoV-2. *Nature*, doi:10.1038/s41586-020-2381-y. (2020).

- 371 9 Robbiani, D. F. *et al.* Convergent antibody responses to SARS-CoV-2 in convalescent  
372 individuals. *Nature* **18**, 18, doi: <https://dx.doi.org/10.1038/s41586-020-2456-9> (2020).
- 373 10 Long, Q.-X. *et al.* Antibody responses to SARS-CoV-2 in patients with COVID-19. *Nature*  
374 *Medicine* **26**, 845-848, doi:10.1038/s41591-020-0897-1 (2020).
- 375 11 Wölfel, R. *et al.* Virological assessment of hospitalized patients with COVID-2019. *Nature*  
376 **581**, 465-469, doi:10.1038/s41586-020-2196-x (2020).
- 377 12 Mathew, D. *et al.* Deep immune profiling of COVID-19 patients reveals distinct  
378 immunotypes with therapeutic implications. *Science (New York, NY)*,  
379 doi:10.1126/science.abc8511. (2020).
- 380 13 Slifka, M. K. & Ahmed, R. Long-term antibody production is sustained by antibody-  
381 secreting cells in the bone marrow following acute viral infection. *Ann N Y Acad Sci* **797**,  
382 166-176, doi:10.1111/j.1749-6632.1996.tb52958.x (1996).
- 383 14 Knox, J. J. *et al.* T-bet<sup>+</sup> B cells are induced by human viral infections and dominate the  
384 HIV gp140 response. *JCI Insight* **2**, doi:10.1172/jci.insight.92943 (2017).
- 385 15 Ma, H. *et al.* Serum IgA, IgM, and IgG responses in COVID-19. *Cellular & Molecular*  
386 *Immunology* **17**, 773-775, doi:10.1038/s41423-020-0474-z (2020).
- 387 16 Tan, C. W. *et al.* A SARS-CoV-2 surrogate virus neutralization test based on antibody-  
388 mediated blockage of ACE2–spike protein–protein interaction. *Nature Biotechnology*,  
389 doi:10.1038/s41587-020-0631-z (2020).
- 390 17 Krishnamurty, A. T. *et al.* Somatically Hypermutated Plasmodium-Specific IgM(+)  
391 Memory B Cells Are Rapid, Plastic, Early Responders upon Malaria Rechallenge.  
392 *Immunity* **45**, 402-414, doi:10.1016/j.immuni.2016.06.014 (2016).

- 393 18 Ladner, J. T. *et al.* Epitope-resolved profiling of the SARS-CoV-2 antibody response  
394 identifies cross-reactivity with an endemic human CoV. *bioRxiv*, 2020.2007.2027.222943,  
395 doi:10.1101/2020.07.27.222943 (2020).
- 396 19 Braun, J. *et al.* SARS-CoV-2-reactive T cells in healthy donors and patients with COVID-  
397 19. *Nature*, doi:10.1038/s41586-020-2598-9 (2020).
- 398 20 Weiskopf, D. *et al.* Phenotype and kinetics of SARS-CoV-2-specific T cells in COVID-19  
399 patients with acute respiratory distress syndrome. *Sci Immunol* **5**,  
400 doi:10.1126/sciimmunol.abd2071 (2020).
- 401 21 Knox, J. J., Kaplan, D. E. & Betts, M. R. T-bet-expressing B cells during HIV and HCV  
402 infections. *Cell Immunol* **321**, 26-34, doi:10.1016/j.cellimm.2017.04.012 (2017).
- 403 22 Weisel, F. & Shlomchik, M. Memory B Cells of Mice and Humans. *Annual Review of*  
404 *Immunology* **35**, 255-284, doi:10.1146/annurev-immunol-041015-055531 (2017).
- 405 23 Bentebibel, S. E. *et al.* Induction of ICOS<sup>+</sup>CXCR3<sup>+</sup>CXCR5<sup>+</sup> TH cells correlates with  
406 antibody responses to influenza vaccination. *Sci Transl Med* **5**, 176ra132,  
407 doi:10.1126/scitranslmed.3005191 (2013).
- 408 24 Reiss, S. *et al.* Comparative analysis of activation induced marker (AIM) assays for  
409 sensitive identification of antigen-specific CD4 T cells. *PLoS One* **12**, e0186998,  
410 doi:10.1371/journal.pone.0186998 (2017).
- 411 25 Vinuesa, C. G., Linterman, M. A., Yu, D. & MacLennan, I. C. Follicular Helper T Cells.  
412 *Annu Rev Immunol* **34**, 335-368, doi:10.1146/annurev-immunol-041015-055605 (2016).
- 413 26 Pepper, M. & Jenkins, M. K. Origins of CD4(+) effector and central memory T cells. *Nat*  
414 *Immunol* **12**, 467-471, doi:10.1038/ni.2038 (2011).

- 415 27 Juno, J. A. *et al.* Humoral and circulating follicular helper T cell responses in recovered  
416 patients with COVID-19. *Nature medicine*, doi:10.1038/s41591-020-0995-0. (2020).
- 417 28 Le Bert, N. *et al.* SARS-CoV-2-specific T cell immunity in cases of COVID-19 and SARS,  
418 and uninfected controls. *Nature*, doi:10.1038/s41586-020-2550-z (2020).
- 419 29 Alsoussi, W. B. *et al.* A Potently Neutralizing Antibody Protects Mice against SARS-CoV-  
420 2 Infection. *J Immunol*, doi:10.4049/jimmunol.2000583 (2020).
- 421 30 Hanke, L. *et al.* An alpaca nanobody neutralizes SARS-CoV-2 by blocking receptor  
422 interaction. *bioRxiv*, 2020.2006.2002.130161, doi:10.1101/2020.06.02.130161 (2020).
- 423 31 Tang, F. *et al.* Lack of Peripheral Memory B Cell Responses in Recovered Patients with  
424 Severe Acute Respiratory Syndrome: A Six-Year Follow-Up Study. *The Journal of*  
425 *Immunology* **186**, 7264-7268, doi:10.4049/jimmunol.0903490 (2011).
- 426 32 Wu, L. P. *et al.* Duration of antibody responses after severe acute respiratory syndrome.  
427 *Emerg Infect Dis* **13**, 1562-1564, doi:10.3201/eid1310.070576 (2007).
- 428 33 Seow, J. *et al.* Longitudinal evaluation and decline of antibody responses in SARS-CoV-2  
429 infection. *medRxiv*, 2020.2007.2009.20148429, doi:10.1101/2020.07.09.20148429 (2020).
- 430 34 Perreault, J. *et al.* Longitudinal analysis of the humoral response to SARS-CoV-2 spike  
431 RBD in convalescent plasma donors. *bioRxiv*, 2020.2007.2016.206847,  
432 doi:10.1101/2020.07.16.206847 (2020).
- 433 35 Wajnberg, A. *et al.* SARS-CoV-2 infection induces robust, neutralizing antibody responses  
434 that are stable for at least three months. *medRxiv*, 2020.2007.2014.20151126,  
435 doi:10.1101/2020.07.14.20151126 (2020).

- 436 36 Isho, B. *et al.* Evidence for sustained mucosal and systemic antibody responses to SARS-  
437 CoV-2 antigens in COVID-19 patients. *medRxiv*, 2020.2008.2001.20166553,  
438 doi:10.1101/2020.08.01.20166553 (2020).
- 439 37 Plotkin, S. A. Correlates of protection induced by vaccination. *Clin Vaccine Immunol* **17**,  
440 1055-1065, doi:10.1128/CVI.00131-10 (2010).
- 441 38 Grifoni, A. *et al.* Targets of T Cell Responses to SARS-CoV-2 Coronavirus in Humans  
442 with COVID-19 Disease and Unexposed Individuals. *Cell* **181**, 1489-1501 e1415,  
443 doi:10.1016/j.cell.2020.05.015 (2020).
- 444 39 Rubtsova, K., Rubtsov, A. V., van Dyk, L. F., Kappler, J. W. & Marrack, P. T-box  
445 transcription factor T-bet, a key player in a unique type of B-cell activation essential for  
446 effective viral clearance. *Proc Natl Acad Sci U S A* **110**, E3216-3224,  
447 doi:10.1073/pnas.1312348110 (2013).
- 448 40 Lee, Y. K. *et al.* Late developmental plasticity in the T helper 17 lineage. *Immunity* **30**, 92-  
449 107, doi:10.1016/j.immuni.2008.11.005 (2009).
- 450 41 Peng, S. L., Szabo, S. J. & Glimcher, L. H. T-bet regulates IgG class switching and  
451 pathogenic autoantibody production. *Proc Natl Acad Sci U S A* **99**, 5545-5550,  
452 doi:10.1073/pnas.082114899 (2002).
- 453 42 Hirota, K. *et al.* Plasticity of Th17 cells in Peyer's patches is responsible for the induction  
454 of T cell-dependent IgA responses. *Nat Immunol* **14**, 372-379, doi:10.1038/ni.2552 (2013).
- 455 43 Mateus, J. *et al.* Selective and cross-reactive SARS-CoV-2 T cell epitopes in unexposed  
456 humans. *Science*, doi:10.1126/science.abd3871 (2020).
- 457 44 Chandrashekar, A. *et al.* SARS-CoV-2 infection protects against rechallenge in rhesus  
458 macaques. *Science*, doi:10.1126/science.abc4776 (2020).

459 45 Erasmus, J. H. *et al.* Single-dose replicating RNA vaccine induces neutralizing antibodies  
460 against SARS-CoV-2 in nonhuman primates. *bioRxiv*, doi:10.1101/2020.05.28.121640  
461 (2020).  
462

## Figure 1

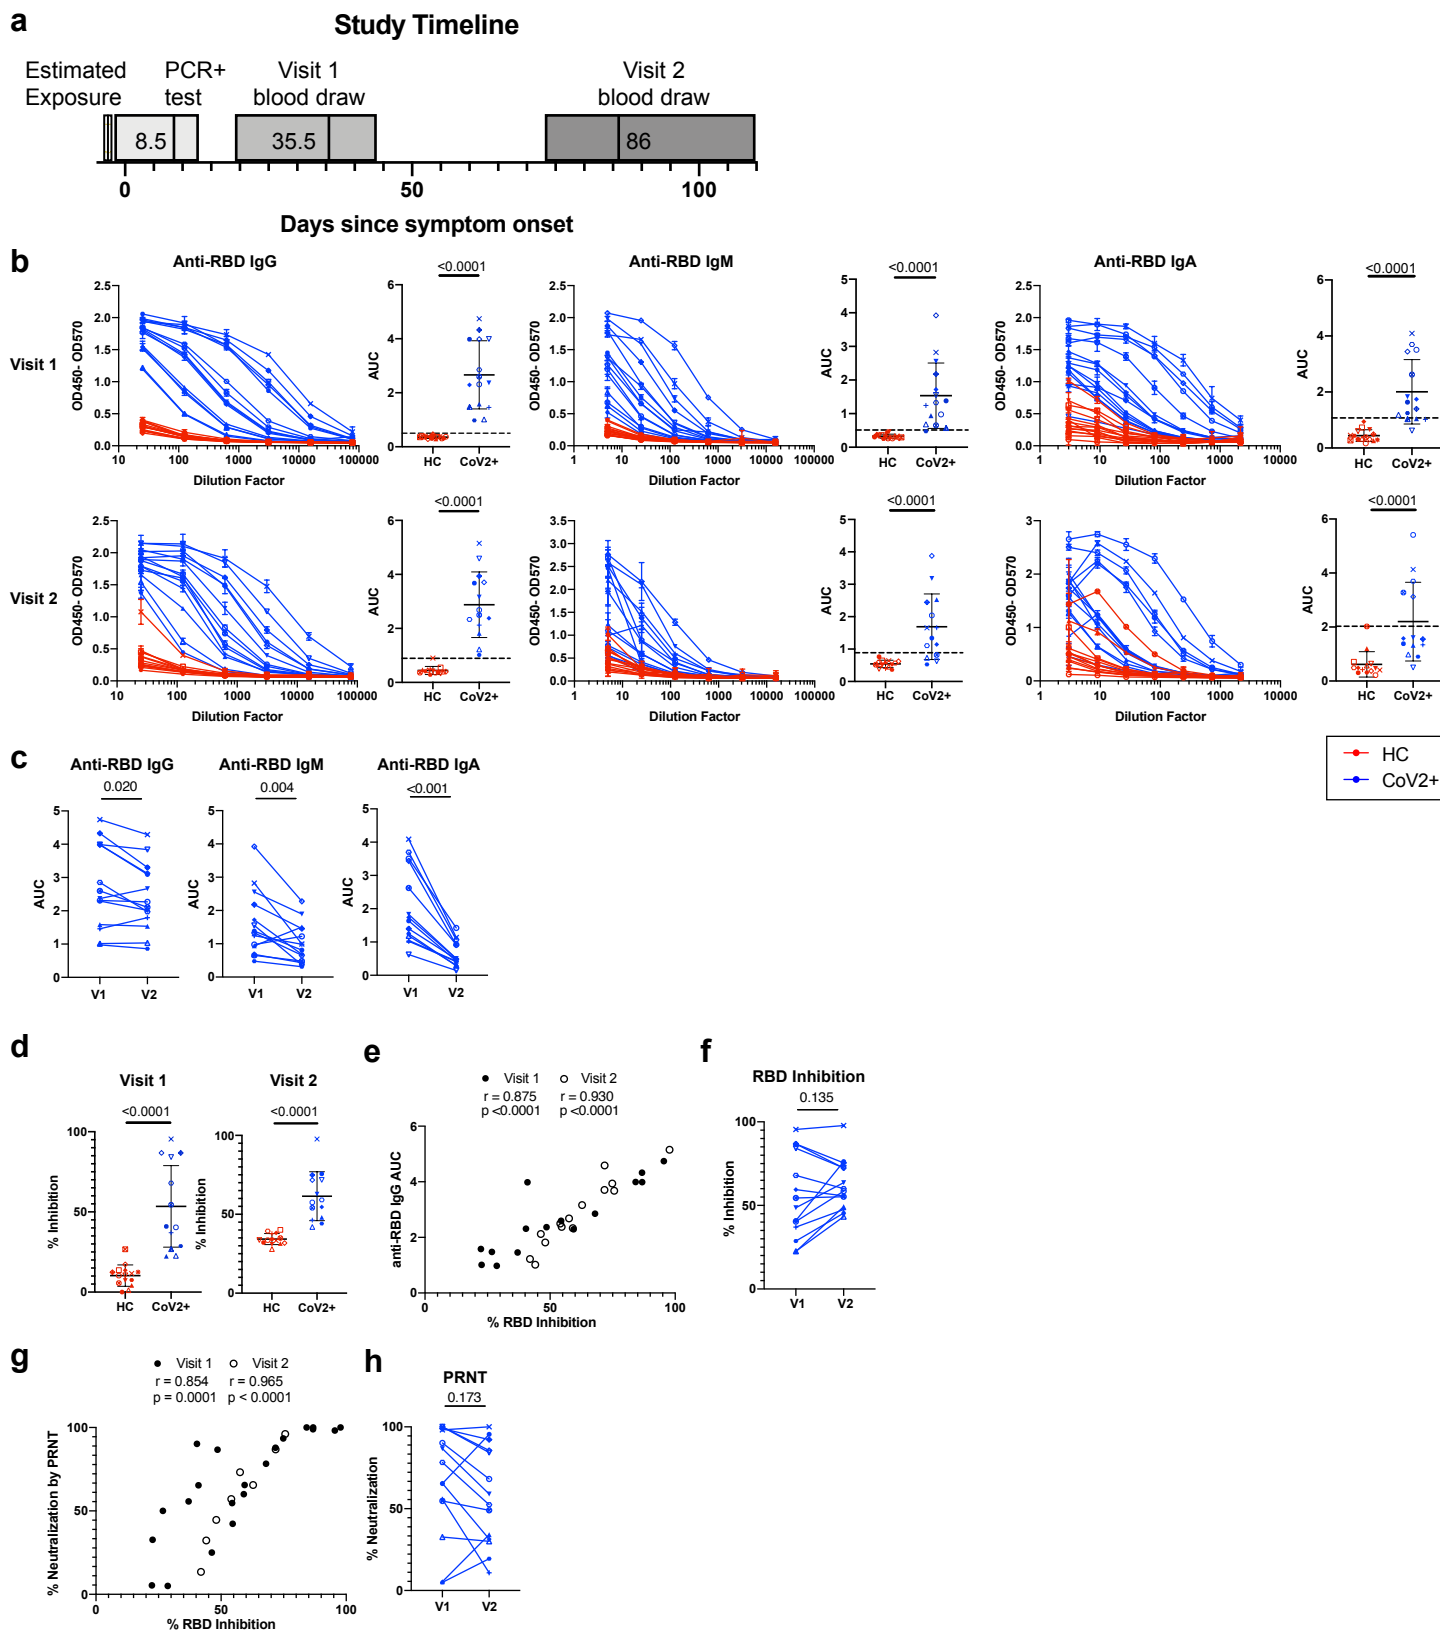

463 **Figure 1: SARS-CoV-2-specific plasma antibodies at two memory time points.**

464 **a)** Study timeline. Range indicated by box and median indicated by line for each event. **b)**  
465 ELISA dilution curves and AUC for anti-RBD IgG (left), IgM (center), and IgA (right) from  
466 healthy control (HC) and previously SARS-CoV-2-infected (CoV2<sup>+</sup>) plasma samples at Visit 1  
467 (V1) and Visit 2 (V2). Dashed line indicates mean + 3 SD of the HC AUC values. Each symbol  
468 is a different individual and is consistent throughout the figure. **c)** V2 CoV2<sup>+</sup> AUC values were  
469 normalized to V1 samples run with V2 samples and AUC for each CoV2<sup>+</sup> individual from V1  
470 and V2 are paired. **d)** Percent inhibition of RBD binding to ACE2 by plasma at 1:10 dilution. **e)**  
471 Spearman correlation between percent RBD inhibition at a 1:10 plasma dilution and anti-RBD  
472 IgG AUC. **f)** CoV2<sup>+</sup> percent RBD inhibition at 1:10 plasma dilution normalized and paired as in  
473 c). **g)** Spearman correlation between percent RBD inhibition at a 1:10 plasma dilution and  
474 percent virus neutralization by PRNT at a 1:160 plasma dilution. **h)** CoV2<sup>+</sup> percent virus  
475 neutralization by PRNT at a 1:160 plasma dilution normalized and paired as in c). Statistical  
476 significance for unpaired data determined by two-tailed Mann-Whitney tests and, for paired data,  
477 by two-tailed Wilcoxon signed-rank tests. Error bars represent mean and SD (V1 HC n=15, V2  
478 HC n=14, V1 CoV2<sup>+</sup> n=15, V2 CoV2<sup>+</sup> n=14).



**Figure 2**

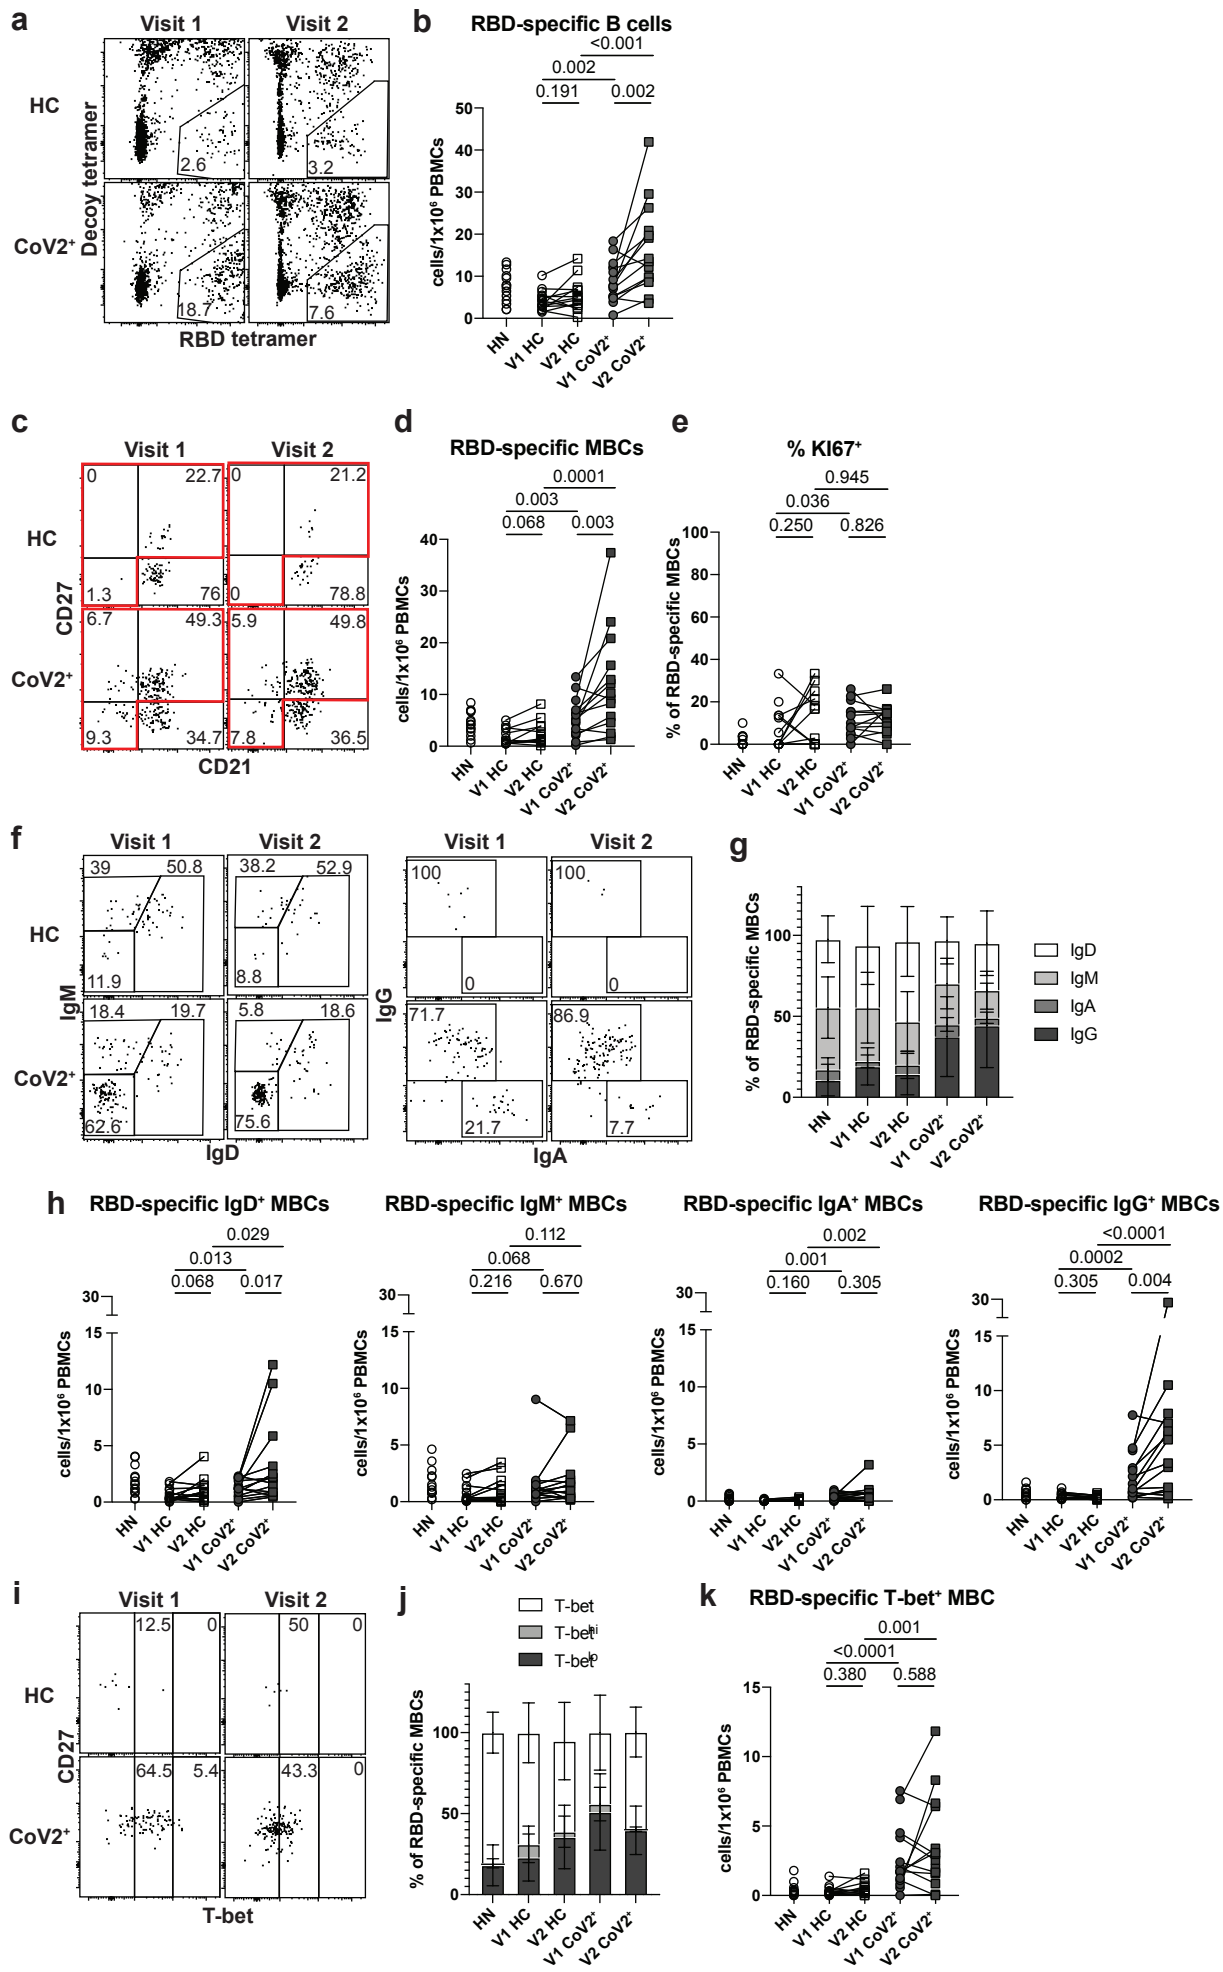

479 **Figure 2: RBD-specific MBCs form and persist in PBMCs post-mild COVID-19.**

480 **a)** Representative gating of Live CD3<sup>-</sup>CD14<sup>-</sup>CD16<sup>-</sup> cells for SARS-CoV-2 RBD-specific cells  
481 (RBD tetramer<sup>+</sup>Decoy<sup>-</sup>) and **b)** number of RBD-specific B cells (RBD tetramer<sup>+</sup>Decoy<sup>-</sup>CD20<sup>+</sup>)  
482 from SARS-CoV-2-recovered (CoV2<sup>+</sup>) and healthy control (HC) PBMCs at Visit 1 (V1) and  
483 Visit 2 (V2). Gating strategy shown in Extended Data Figure 5c. **c)** Representative gating and **d)**  
484 Number of RBD-specific memory B cells (MBCs: CD21<sup>+</sup>CD27<sup>+</sup>/CD21<sup>-</sup>CD27<sup>+</sup>/CD21<sup>-</sup>CD27<sup>-</sup>  
485 populations outlined in red in c)(HN n=14, V1 HC n=12, V2 HC n=13 , V1 CoV2<sup>+</sup> n=15, V2  
486 CoV2<sup>+</sup> n=14). **e)** Frequency of cycling (Ki67<sup>+</sup>) RBD-specific MBCs. **f)** Representative gating, **g)**  
487 frequency (HN n=14, V1 HC n=12, V2 HC n=13, V1 CoV2<sup>+</sup> n=15, V2 CoV2<sup>+</sup> n=14) and **h)**  
488 number of RBD-specific MBCs expressing the BCR isotypes IgD, IgM, IgA and IgG. **i)**  
489 Representative gating, **j)** frequency and **k)** number of RBD-specific MBCs expressing T-bet.  
490 Statistical significance determined by two-tailed, Mann-Whitney test (HC vs. CoV2<sup>+</sup>) and two-  
491 tailed Wilcoxon signed rank test (V1 vs V2). Error bars represent mean and SD (HN n=14, V1  
492 HC n=15, V2 HC n=15, V1 CoV2<sup>+</sup> n=15, V2 CoV2<sup>+</sup> n=14 unless otherwise noted, 2  
493 experiments).

### Figure 3

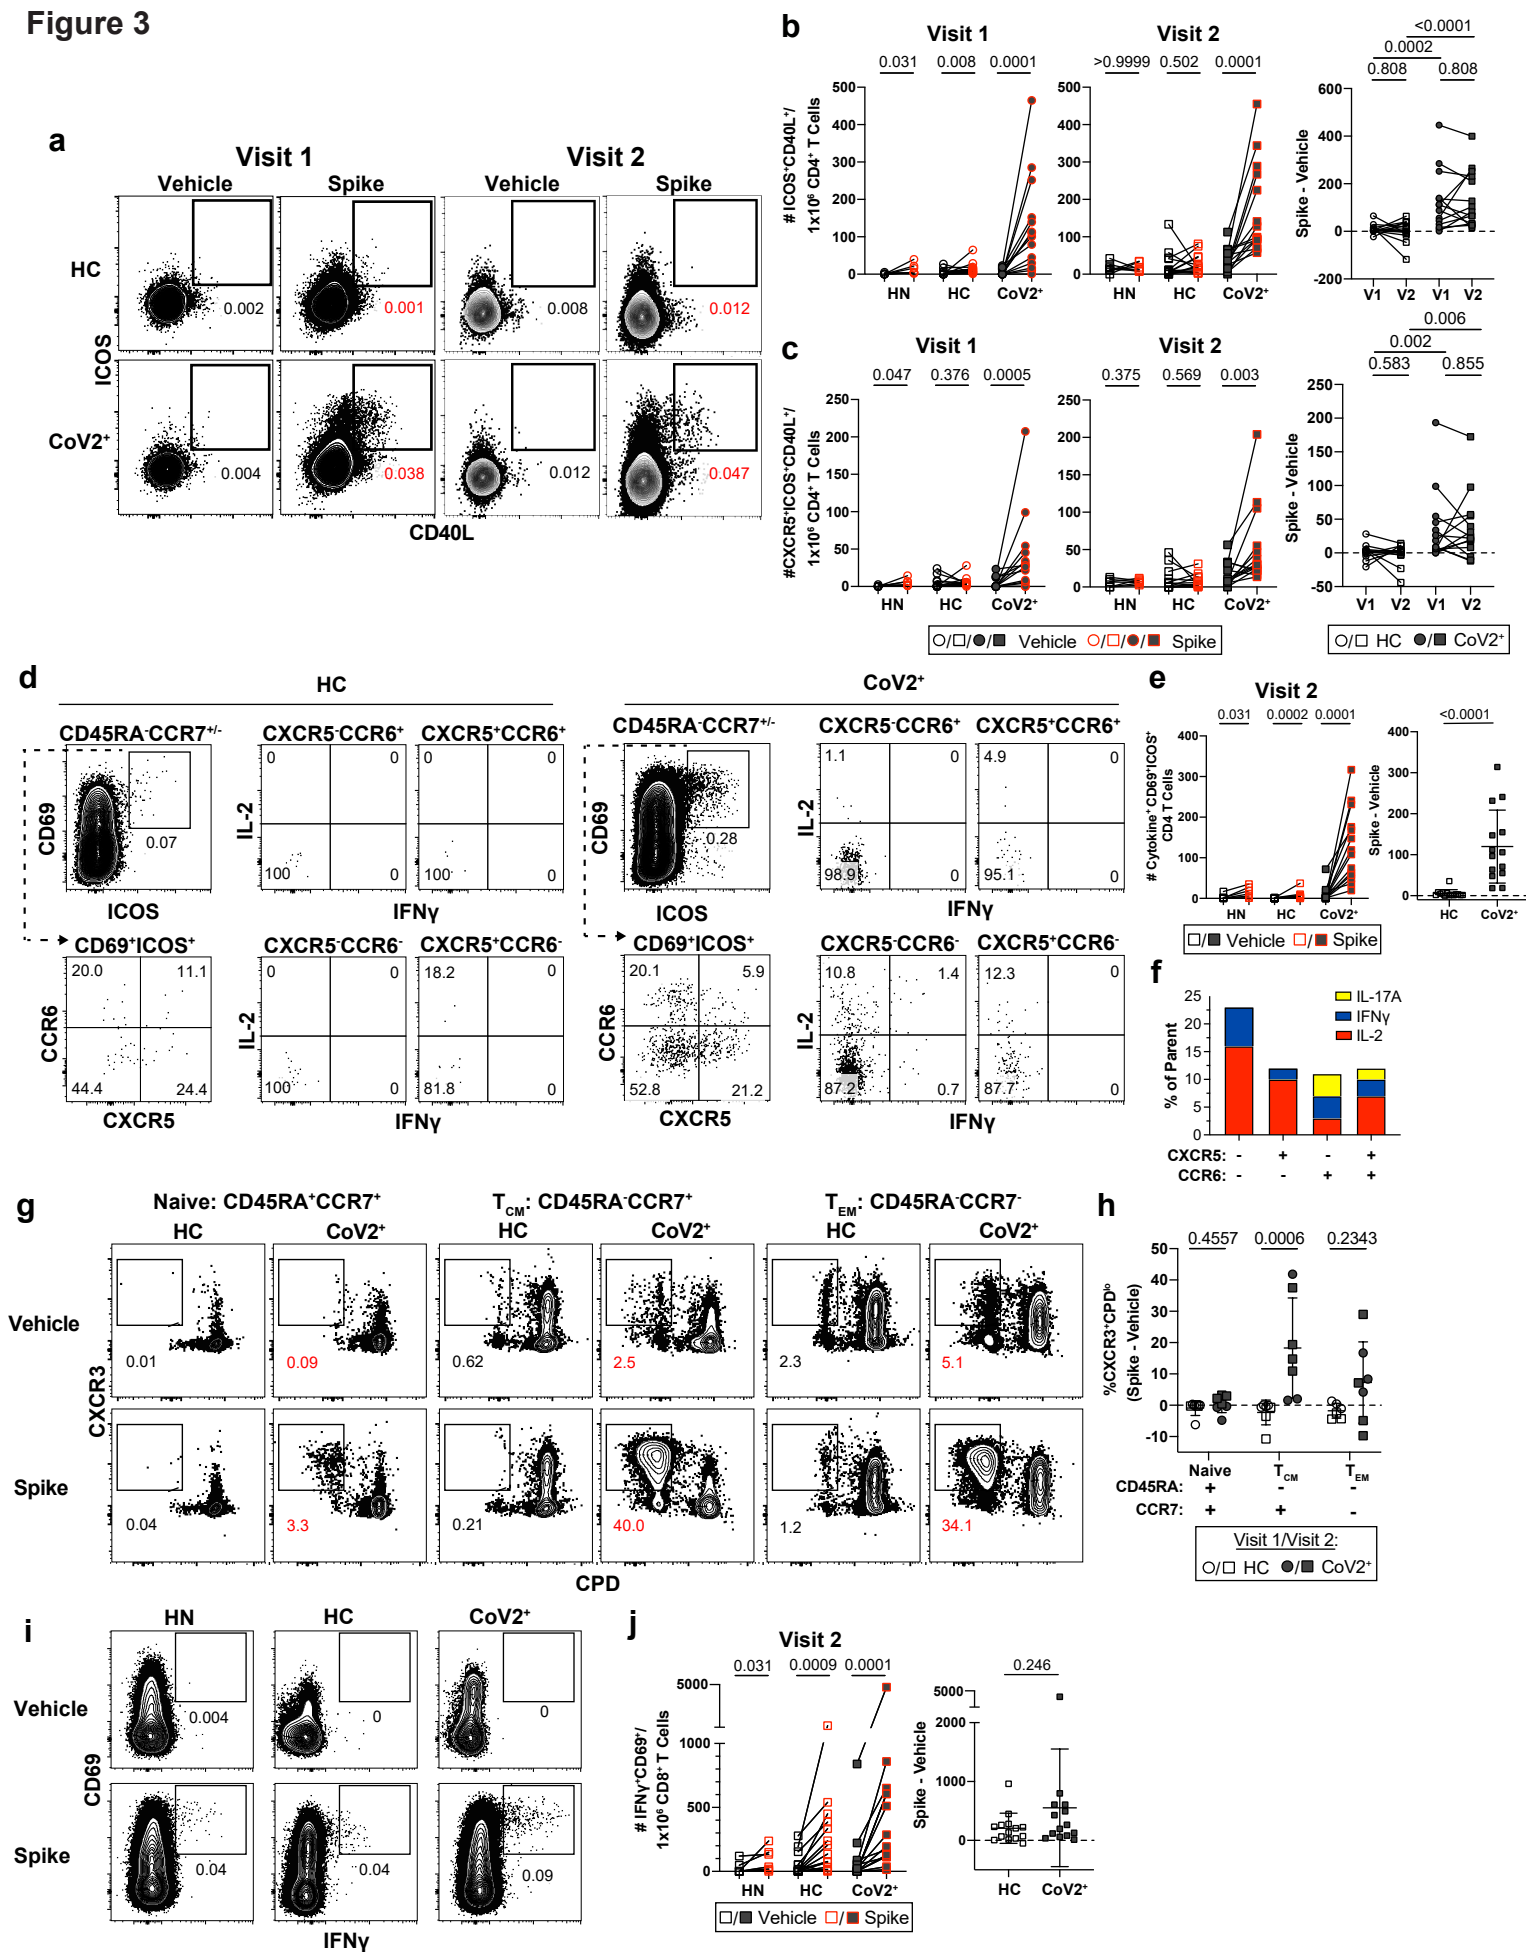

494 **Figure 3: *Ex vivo* reactivation of spike-specific CD4<sup>+</sup> T Cells reveals durable and functional**  
495 **immune memory in SARS-CoV-2-recovered individuals.**

496 **a)** Representative flow cytometry plots 20 hours after Vehicle control or Spike-stimulation of  
497 PBMCs from HC and CoV2<sup>+</sup> individuals demonstrating T cell upregulation of CD40L and ICOS  
498 on CD45RA<sup>-</sup>CD4<sup>+</sup> T cells. **b)** Enumeration of total CD40L<sup>+</sup>ICOS<sup>+</sup> and **c)**  
499 CXCR5<sup>+</sup>CD40L<sup>+</sup>ICOS<sup>+</sup> (cTfh) per 1e6 CD4<sup>+</sup> T Cells and paired CoV2<sup>+</sup> data from Visit 1 and  
500 Visit 2 represented as frequency of spike minus vehicle. **d)** Representative flow cytometry plots  
501 and **e)** number of CD69<sup>+</sup>ICOS<sup>+</sup> CD4<sup>+</sup> T Cells producing intracellular cytokines and number  
502 producing cytokine after incubation with spike minus number after incubation with vehicle. **f)**  
503 Relative distribution of effector cytokine production in memory T Cell compartments (CCR6<sup>+/+</sup>-  
504 cTfh and non-cTfh) following *ex vivo* stimulation for 20 hrs; (IFN- $\gamma$ ; blue) (IL-2; red) (IL-17A;  
505 yellow) from **(d)**. **g)** Antigen-specific T cell proliferation of sorted CD4<sup>+</sup> naive or memory T  
506 cells in control and CoV2<sup>+</sup> PBMCs. Proliferation following 5-6 day co-culture with SARS-CoV-  
507 2 spike protein-pulsed autologous monocytes. **h)** Antigen-specific expansion represented as  
508 frequency of spike minus vehicle, CXCR3<sup>+</sup>CPD<sup>low</sup> responding cells. **i)** Representative flow  
509 cytometry plots and **j)** quantification of spike-specific CD8<sup>+</sup> T Cells in control and Cov2<sup>+</sup>  
510 PBMCs stimulated with SARS-CoV-2 spike protein. **a-h)** Significance was determined by  
511 Kruskal-Wallis test correcting for multiple comparisons using FDR two-stage method. Adjusted  
512 p values are reported. **i-j)** Significance was determined by two-tailed, non-parametric Mann-  
513 Whitney tests. **a-j)** Data represented as mean and SD; Each symbol represents one donor. **a-f, i-j)**  
514 n=7 HN, n=14 HC, n=14 CoV2<sup>+</sup>(2 experiments). **g-h)** n=3 V1 HC, n=4 V2 HC, n=3 V1 CoV2<sup>+</sup>,  
515 n=4 V2 CoV2<sup>+</sup> (2 experiments).

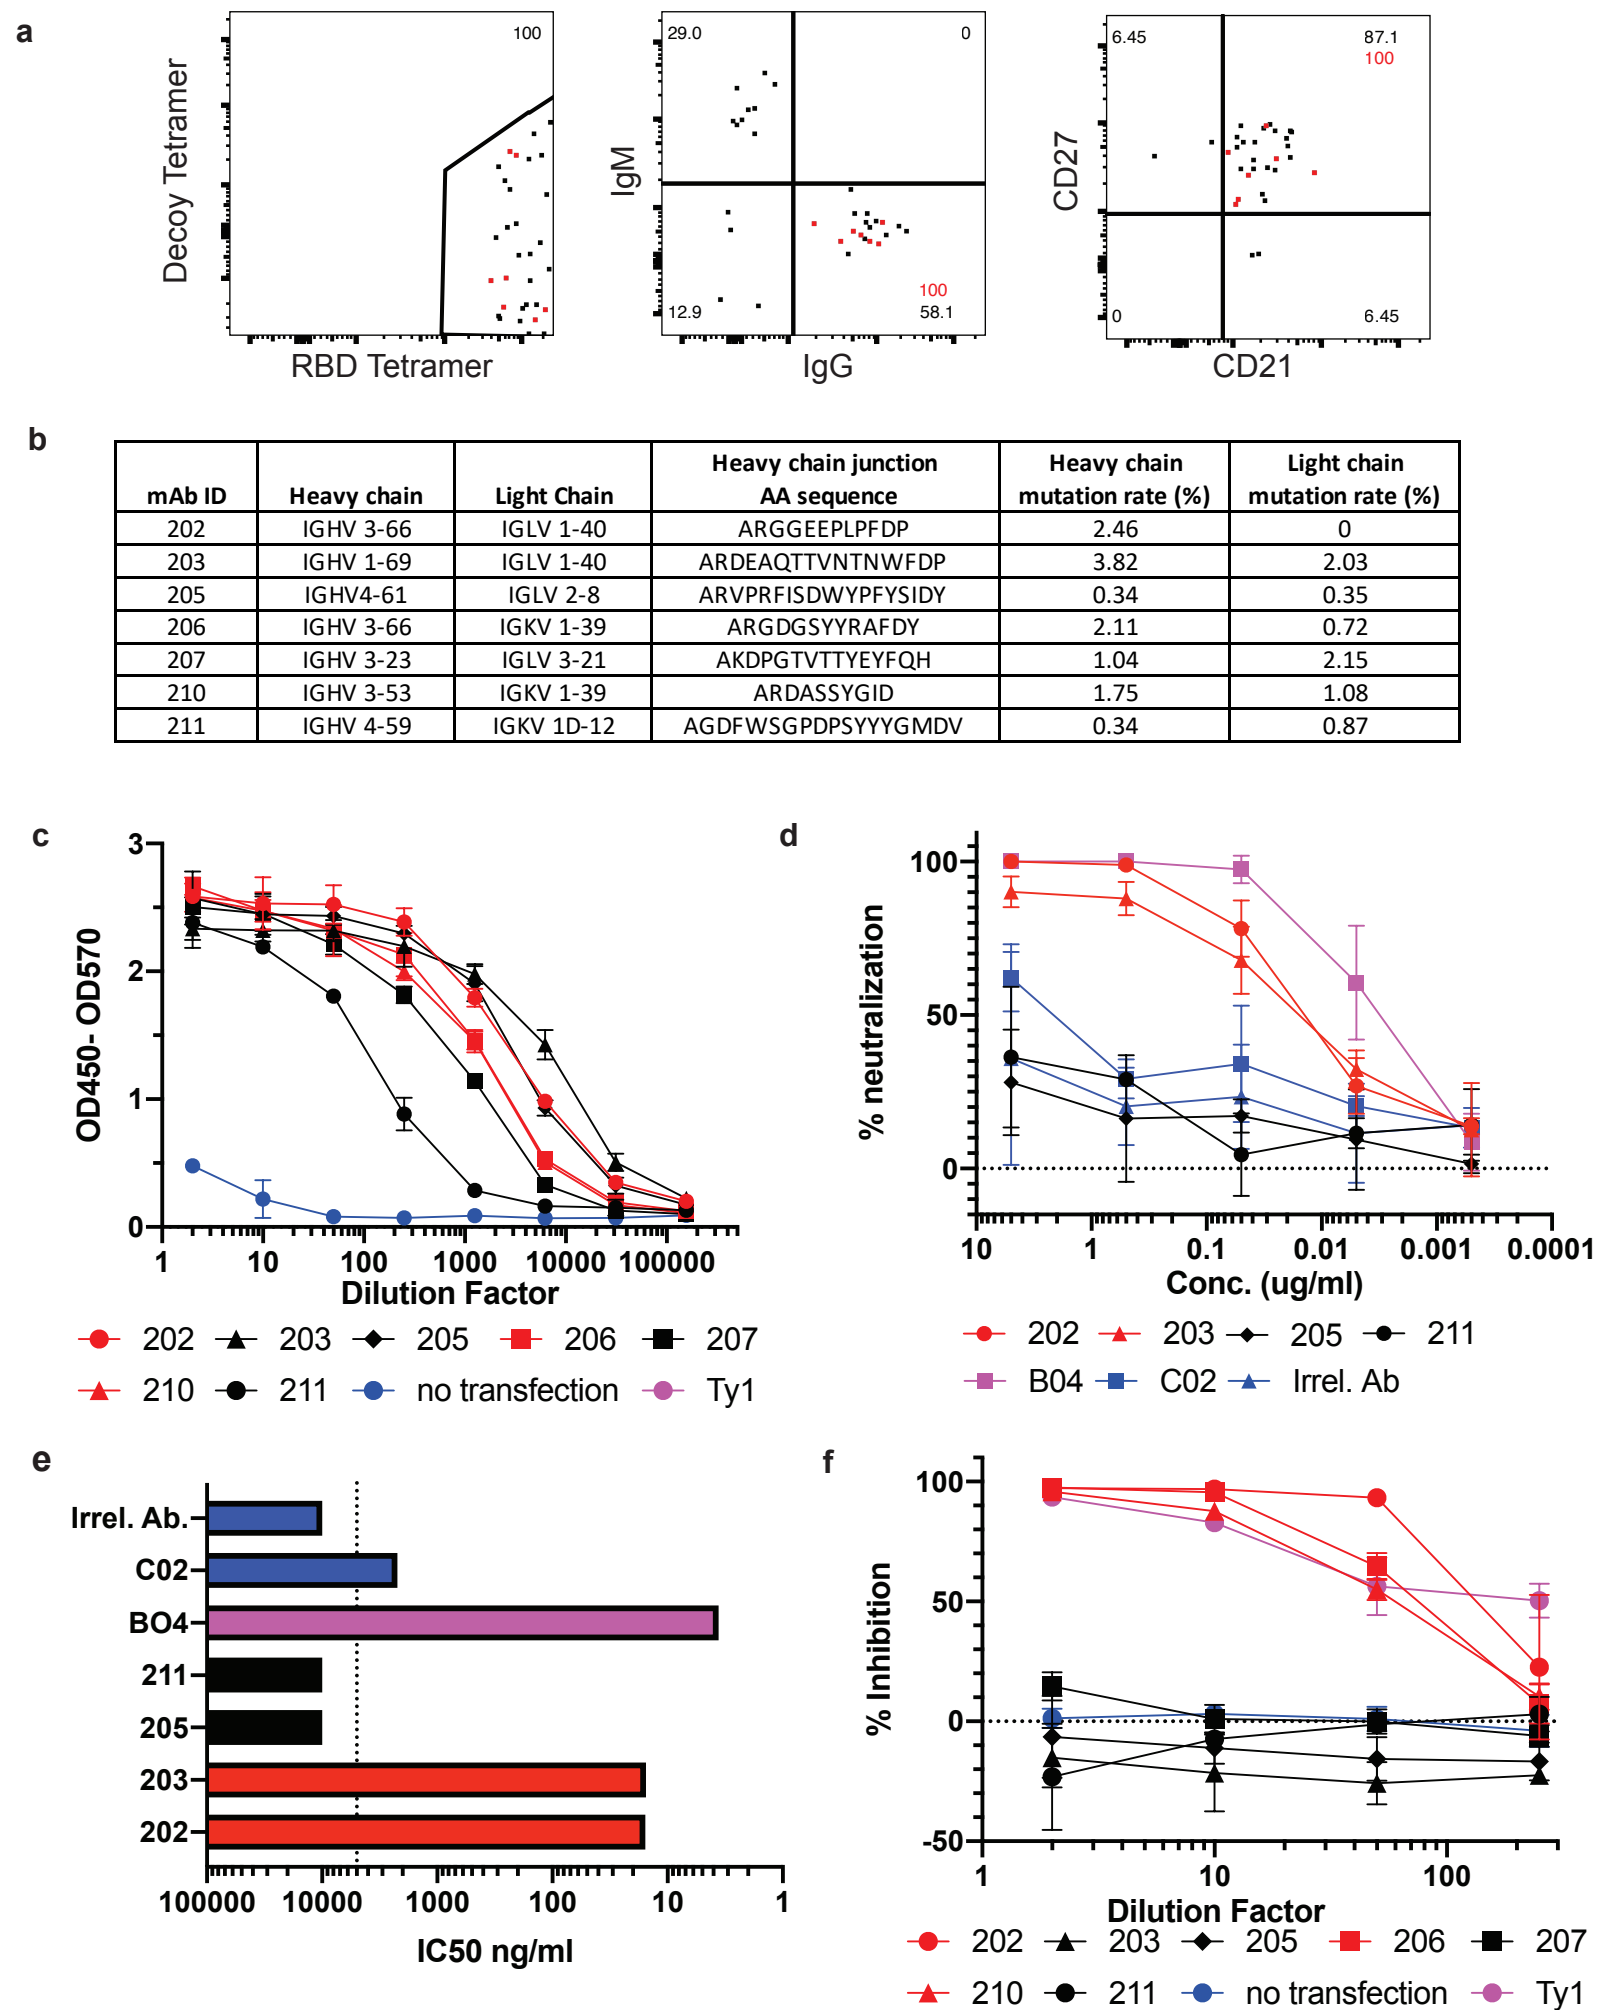

516 **Figure 4. Generation of neutralizing antibodies by RBD-specific MBCs.**

517 **a)** Flow plots of index sorted RBD-tetramer specific B cells (gating scheme in Extended Data  
518 Figure 7a). B cell receptors (BCRs) cloned from cells shown in red. **b)** Heavy and light chain  
519 gene usage, somatic hypermutation rate and VDJ junction sequence of cloned BCRs. **c)** Anti-  
520 RBD ELISA of culture supernatants from cells transfected to express one of the monoclonal  
521 antibodies compared to a known RBD-binding and neutralizing antibody (Ty1) and supernatant  
522 from untransfected cells (no transfection). **d)** Neutralization capacity of purified monoclonal  
523 antibodies as measured by PRNT. BO4 and CO2 are previously identified strong and weak  
524 neutralizing murine antibodies. **e)** IC50 values of antibodies calculated from PRNT. Dotted line  
525 represents the limit of detection. **f)** Inhibition of RBD-ACE2 binding by culture supernatants  
526 from antibody transfections (antibodies with high inhibitory capacity shown in red).

527 **Methods:**

528 **Ethics Statement**

529 This study was approved by the University of Washington Institutional Review Board (Gale Lab,  
530 IRB 00009810). Informed consent was obtained from all enrolled participants. Samples were de-  
531 identified prior to transfer to the Pepper Lab.

532 **Study Participants:**

533 The study was conceptualized utilizing a prospective case-control design. Cases and controls were  
534 identified from a cross-sectional cohort study that recruited via print and online advertising from  
535 the Seattle metropolitan area (**E.D. Table 1**). Cases (n=15) were selected based on a reported  
536 history of a positive SARS-CoV-2 PCR nasal swab. Controls (n=17) were selected based on having  
537 no prior positive SARS-CoV-2 PCR nasal swab and having no detectable SARS-CoV-2 RBD- or  
538 S-specific IgG or IgM plasma antibodies (within mean + 3 SD of 5 de-identified plasma samples  
539 drawn prior to 2020 generously donated by Wesley C. Van Voorhis). At the time of enrollment,  
540 information was collected from all participants regarding recent illness symptoms and severity.  
541 All CoV2<sup>+</sup> cases reported at least one symptom but all were classified as mild disease, as none  
542 required hospitalization. Historical negative control PBMCs (n=14) were sourced from the BRI  
543 PBMC repository. Samples were drawn prior to 2020 and age and sex matched to the CoV2<sup>+</sup> cases.

544

545 **Peripheral blood mononuclear cell (PBMC) and plasma collection**

546 6-10 milliliters of venous blood from study volunteers were collected in EDTA tubes and spun at  
547 1500xg for 10 minutes. Plasma was collected, heat-inactivated at 56°C for 30 minutes, aliquoted

548 and stored at -80°C. The cellular fraction was resuspended in PBS and PBMC were separated from  
549 RBC using Sepmate PBMC Isolation Tubes (STEMCELL Technologies) according to  
550 manufacturer's instruction and frozen at -80°C before being stored in liquid nitrogen. PBMCs were  
551 thawed at 37°C and washed twice before use.

552

## 553 **SARS-CoV-2 Protein Production and Purification**

### 554 *Plasmid construction*

555 The SARS-CoV-2 S<sup>B</sup> (BEI NR-52422) construct was synthesized by GenScript into pcDNA3.1-  
556 with an N-terminal mu-phosphatase signal peptide and a C-terminal octa-histidine tag  
557 (GHHHHHHHH). The boundaries of the construct are N-<sub>328</sub>RFPN<sub>331</sub> and C-<sub>528</sub>KKST<sub>531</sub>. The  
558 SARS-CoV-2 S-2P ectodomain trimer (GenBank: YP\_009724390.1, BEI NR-52420; cite PMID  
559 32155444) was synthesized by GenScript into pCMV with an N-terminal mu-phosphatase signal  
560 peptide and a C-terminal TEV cleavage site (GSGRENLYPQG), T4 fibritin foldon  
561 (GGGSGYIPEAPRDGQAYVRKDGEWLLSTPL), and octa-histidine tag (GHHHHHHHHH).  
562 The construct contains the 2P mutations (proline substitutions at residues 986 and 987; PMID  
563 28807998) and an <sub>682</sub>SGAG<sub>685</sub> substitution at the furin cleavage site. A pCAGGS vector containing  
564 the spike protein RBD from SARS-CoV-2 (Wuhan-Hu-1 isolate) was generously provided by  
565 Florian Krammer.

566

### 567 *Transient expression*

568 Constructs were produced in Expi293F cells grown in suspension using Expi293F expression  
569 medium (Life technologies) at 33°C, 70% humidity, and 8% CO<sub>2</sub> rotating at 150 rpm. The cultures  
570 were transfected using PEI-MAX (Polyscience) with cells grown to a density of 3.0 million cells



571 per mL and cultivated for 3 days. Supernatants was clarified by centrifugation (5 minutes at 4000  
572 rcf), addition of PDADMAC solution to a final concentration of 0.0375% (Sigma Aldrich,  
573 #409014), and a second spin (5 minutes at 4000 rcf).

574

#### 575 *Purification of His-tagged proteins*

576 Proteins were purified from clarified supernatants via a batch bind method where each supernatant  
577 was supplemented with 1 M Tris-HCl pH 8.0 to a final concentration of 45 mM and 5 M NaCl to  
578 a final concentration of ~310 mM). Talon cobalt affinity resin (Takara) was added to the treated  
579 supernatants and allowed to incubate for 15 minutes with gentle shaking. Resin was collected using  
580 vacuum filtration using a 0.2 µm filter and transferred to a gravity column. The resin was washed  
581 with 20 mM Tris pH 8.0, 300 mM NaCl, and the protein was eluted with three column volumes of  
582 20 mM Tris pH 8.0, 300 mM imidazole, 300 mM NaCl. The batch bind process was then repeated  
583 and the first and second elutions combined. SDS-PAGE was used to assess purity. Purified S-2P  
584 trimer was concentrated to ~1 mg/mL and dialyzed into 50 mM Tris pH 8, 150 mM NaCl, 0.25%  
585 L-Histidine, 5% glycerol in a hydrated 10k molecular weight cutoff dialysis cassette (Thermo  
586 Scientific). The purified RBD protein was dialyzed into 50 mM Tris pH 7, 185 mM NaCl, 100  
587 mM Arginine, 4.5% glycerol, 0.75% w/v CHAPS. Due to inherent instability, S-2P was  
588 immediately flash frozen and stored at -80°C.

589

#### 590 **Tetramer generation**

591 Recombinant trimeric spike and the RBD domain were both biotinylated using a EZ-Link Sulfo-  
592 NHS-LC Biotinylation Kit (ThermoFisher), tetramerized with streptavidin-PE (Agilent) and stored  
593 in 50% glycerol at -20°C as previously described<sup>17</sup>. Decoy reagent was generated by tetramerizing

594 an irrelevant biotinylated protein with SA-PE previously conjugated to AF647 using an Alexa  
595 Fluor 647 Antibody Labeling Kit (ThermoFisher).

596

#### 597 **Tetramer validation in mice**

598 Adult C57BL/6j mice (The Jackson Laboratory) were immunized with 50ug SARS-CoV-2 RBD  
599 in CFA in the footpad and, 7-10 days later, popliteal lymph nodes were dissected, mashed and  
600 stained in 10nM decoy-PE-APC tetramer and then 10nM RBD-PE as described<sup>17</sup> and as  
601 described below for immunophenotyping B cells. Cells stained for surface markers as indicated  
602 **(Supplemental Table 1)** and run on the LSRII (BD). Data analyzed with FlowJo10 (Becton  
603 Dickinson). Mice were purchased from The Jackson Laboratory and maintained under specific  
604 pathogen free conditions at the University of Washington. All mouse experiments were  
605 performed in accordance with the University of Washington Institutional Care and Use  
606 Committee guidelines.

607

#### 608 **ELISA**

609 96-well plates (Corning) were coated with 2 ug/mL of recombinant SARS-CoV-2 RBD or trimeric  
610 spike protein diluted in PBS and incubated at 4°C overnight. Plates were washed with PBS-T (PBS  
611 containing 0.05% Tween-20) and incubated with blocking buffer (PBS-T and 3% milk) for 1 hour  
612 at room temperature (RT). Serum, culture supernatants or monoclonal antibodies were serially  
613 diluted in dilution buffer (PBS-T and 1% milk) in triplicate, added to plates, and incubated at RT  
614 for 2 hours. Secondary antibodies were diluted in dilution buffer as follows: anti-human IgG-HRP  
615 (Jackson ImmunoResearch) at 1:3000, anti-human IgM-HRP (Southern Biotech) at 1:3000, or  
616 anti-human IgA-HRP (Southern Biotech) at 1:1500. Plates were incubated with secondary

617 antibodies for 1 hour at RT, then detected with 1X TMB (Invitrogen) and quenched with 1M HCl.  
618 Sample optical density (OD) was measured by a spectrophotometer at 450nm and 570nm. CR3022,  
619 a human SARS-CoV antibody previously determined to cross-react with SARS-CoV-2 was used  
620 as a positive control. IgG in culture supernatants was measured using a Human IgG ELISA Kit  
621 (Stemcell) according to the manufacturer's instructions. Data was analysed in Prism (GraphPad).

622

### 623 **Receptor-binding inhibition assay**

624 96-well plates (Corning) were coated with 5 ug/mL of recombinant human ACE2-Fc diluted in  
625 100mM carbonate-bicarbonate buffer (pH 9.6) and incubated at 4°C overnight. Plates were washed  
626 with PBS-T and incubated with blocking buffer for 1 hour at RT. Plasma or monoclonal antibody  
627 supernatants were serially diluted in triplicate in dilution buffer and incubated with 18ng of  
628 recombinant SARS-CoV-2 RBD-HRP (conjugated using Abcam HRP conjugation kit) for 1 hour  
629 at 37C. Blocked plates were washed and incubated with the pre-incubated serum and RBD-HRP  
630 for 1 hour at RT, then detected with TMB and 1M HCl. OD was measured by a spectrophotometer  
631 at 450nm and 570nm. RBD-HRP alone and serum with no RBD-HRP incubation were used as  
632 controls. The % inhibition was calculated as  $(1 - \text{Sample OD value} / \text{Average Negative Control OD}$   
633  $\text{value}) \times 100$ . Data was analysed in Prism (GraphPad).

634

### 635 **Plaque reduction neutralization test (PRNT)**

636 PRNT assays were performed as previously described<sup>45</sup>. Briefly, heat inactivated plasma was  
637 diluted 1:5 followed by four 4-fold serial dilutions and monoclonal antibodies were diluted 1:10  
638 followed by 4 10-fold serial dilution and mixed 1:1 with 600 PFU/ml SARS-CoV-2 WA-1 (BEI  
639 resources) in PBS+0.3% cold water fish skin gelatin (Sigma). After 30 minutes of incubation at

640 37°C, the plasma/virus mixtures were added to 12 well plates of Vero cells and incubated for 1  
641 hour at 37C, rocking every 15 minutes. All dilutions were done in duplicate, along with virus only  
642 and no virus controls. Plates were then washed with PBS and overlaid with a 1:1 mixture of 2.4%  
643 Avicel RC-591 (FMC) and 2X MEM (ThermoFisher) supplemented with 4% heat-inactivated FBS  
644 and Penicillin/Streptomycin (Fisher Scientific.) After a 48 hour incubation, the overlay was  
645 removed, plates were washed with PBS, fixed with 10% formaldehyde (Sigma-Aldrich) in PBS  
646 for 30 minutes at room temp and stained with 1% crystal violet (Sigma-Aldrich) in 20% EtOH. %  
647 Neutralization was calculated as  $(1 - \# \text{ sample plaques} / \# \text{ positive control plaques}) \times 100$ . Data was  
648 analysed in Prism (GraphPad) and IC50 was calculated by sigmoidal interpolation method.

649

## 650 **Cell Enrichment, Stimulations and Flow Cytometry**

### 651 *Immunophenotyping and sorting RBD-specific B cells*

652 Thawed PBMCs were first stained with Decoy tetramer and then with RBD tetramer prior to  
653 incubation with anti-PE magnetic beads and magnetic bead enrichment (Miltenyi Biotec) as  
654 previously described.<sup>17</sup> Bound cells were stained with surface antibodies (**SI Table 1**) and, if  
655 required, were fixed/permeabilized using eBioscience FoxP3 Fix/Perm kit (ThermoFisher; 00-  
656 5521-00) for 30 minutes, followed by incubation with intracellular antibodies (**SI Table 1**). Stained  
657 samples were run on a LSRII flow cytometer and analyzed using FlowJo (Becton Dickinson). For  
658 B cells sorting experiments, single tetramer-specific B cells were indexed sorted on a FACSAriaII  
659 cell sorter and collected in a 96-well PCR plate containing SMART-Seq v4 capture buffer (Takara  
660 Bio).

661

### 662 *Immunophenotyping of PBMCs*

663 For surface phenotyping, total PBMCs (innate cells) or PBMCs from the negative fraction of the  
664 antigen-specific B Cell magnetic columns (for lymphocytes) were washed and incubated with  
665 fluorescently conjugated antibodies. Staining for cTfh analyses were performed as follows:  
666 chemokine-receptors and transcription factors (40 minutes, RT), surface antigens (20 minutes,  
667 4°C)(SI Table 1). Intracellular staining was performed using eBioscience FoxP3 Fix/Perm kit  
668 (ThermoFisher; 00-5521-00)(SI Table 1). For detection of intracellular cytokine production,  
669 PBMC were stimulated with 50 ng/ml phorbol 12-myristate 13-acetate (Sigma-Aldrich) and 1  
670 µg/ml Ionomycin (Sigma-Aldrich; I06434) with 10 µg/ml Brefeldin A (Sigma-Aldrich; B6542)  
671 and 1x dose GolgiStop/monensin (Becton Dickinson; 554724) for 4 hours. Permeabilization and  
672 fixation was performed using Cytofix/Cytoperm (Becton Dickinson; RUO 554714). Intracellular  
673 stains were performed for 30 minutes at 4°C (SI Table 1). Flow cytometry analysis of innate  
674 immune populations was done on 0.5-1 million PBMCs before fraction isolation. Data was  
675 acquired on a Cytex Aurora or BD LSR Fortessa and analyzed using FlowJo10 software (Becton  
676 Dickinson).

677

#### 678 *Ex-Vivo spike Protein Stimulation of Peripheral Blood T Cells*

679 PBMCs from the negative fraction of antigen-specific B Cell magnetic columns were washed and  
680 resuspended to  $4 \times 10^6$  cells/mL with complete RPMI with 10mM HEPES (ThermoFisher;  
681 22400097) supplemented with 10% FBS, 2Me, Pen-Strep, and L-Glutamine. Spike-stimulated  
682 PBMCs were incubated with 2µg/mL full-length recombinant spike protein resuspended in PBS +  
683 5% glycerol. Unstimulated controls received equivalent volume of PBS + 5% glycerol vehicle.  
684 Both conditions were left for 20 hours at 37°C, 5-8% CO<sub>2</sub>, with addition of 10 µg/ml Brefeldin A  
685 (Sigma-Aldrich; B6542) and 1x dose GolgiStop/monensin (Becton Dickinson; 554724) for the

686 final 5 hours to allow for intracellular detection of cytokines. Positive controls were stimulated  
687 with PMA/Ionomycin (see above) for 5 hours in the presence of Brefeldin-A and Monensin.  
688 Staining was performed as follows: chemokine-receptors (40 minutes, RT), surface antigens and  
689 cytokines (20 minutes, 4°C) (**SI Table 1**). Cells were run on the Cytex Aurora and analyzed using  
690 FlowJo (Becton Dickenson).

691

### 692 *Antigen-specific T cell proliferation*

693 Starting with PBMC from healthy control or CoV2<sup>+</sup> individuals, cell proliferation dye (CPD)-  
694 labeled, 1.25uM (ThermoFisher; 65-0840-85), sorted naïve or memory T cell subsets ( $5 \times 10^4$ )  
695 were co-cultured in round-bottomed 96-well plates with irradiated autologous monocytes (5000  
696 rads,  $5 \times 10^4$ ), and provided either full-length recombinant human spike protein (2.5ug/mL)  
697 resuspended in 5% PBS-glycerol or vehicle control. Cultures were supplemented with 5U/mL  
698 recombinant human IL-2 (Biolegend; 589104). Cellular proliferation was assessed after 5-6 days  
699 by flow cytometry (**SI Table 1**) as above and analyzed using FlowJo10 (Becton Dickenson). The  
700 percentage of CXCR3<sup>+</sup>CPD<sup>lo</sup> cells (defined as cells that had undergone 3 or more divisions)  
701 represented as Spike - Vehicle is calculated by subtracting the vehicle control proliferation from  
702 spike-treated proliferation.

703

### 704 **Monoclonal antibody generation**

#### 705 *BCR sequencing and cloning*

706 Amplification of cDNA was performed using SMART-Seq v4 (Takara Bio) at half reaction  
707 volume for each sorted cell. BCR chains were amplified in a multiplex PCR using half reactions  
708 of DreamTaq (Thermo Fisher) and 1.25 ul of resulting cDNA with 3' primers for constant regions

709 of IgM, IgA, (5'-GGAAGGAAGTCCTGTGCGAGGC-3', 5'-  
710 GGAAGAAGCCCTGGACCAGGC-3', Wardemann and Busse, 2019) IgG, IgK, IgL (5'-  
711 TCTTGTCACCTTGGTGTGCT'-3', 5'-GTTTCTCGTAGTCTGCTTTGCTCA-3', 5'-  
712 CACCAGTGTGGCCTTGTGGCTTG-3', Smith et al, 2009) and a 5' primer for the template  
713 switch sequence (5'-GTGGTATCAACGCAGAGTACATGGG-3'). Thermocycler conditions  
714 were 95 °C for 2 min, 30 cycles of 95 °C for 30s, 57 °C for 30s and 72 °C for 1 min.. Resulting  
715 PCR products were cleaned using 5 ul of PCR reaction, 1 ul FastAP (Thermo Fisher), and 0.5 ul  
716 Exonuclease I (ThermoFisher) for 30 minutes at 37°C and inactivated at 75°C for 15 minutes.  
717 Sanger sequencing for each purified sample was performed using each 3' primer from the previous  
718 BCR PCR amplification. Sequences were trimmed at Q30 using Geneious and submitted to  
719 IMGT/HighV-QUEST for alignment (Alamyar et al, 2012). Primers were designed using 5' and  
720 3' cDNA sequence for In-Fusion Cloning Kit and performed according to manufacturer's  
721 instructions. If a 5' or 3' sequence was missing, then the closest matching IMGT germline  
722 sequence was used for primer design. Heavy chains were inserted into IgG1 vectors, kappa and  
723 lambda chains were cloned into vectors with their respective constant regions(Smith et al. 2009).  
724 Cloned plasmids were sequenced and screened by ensuring sequences of chains matched original  
725 cDNA sequence.

726

### 727 *Expression and purification*

728 For small scale transfections, 12 well plates of 293T cells at 80% confluence were transiently  
729 transfected with 0.5ug each of heavy and light chain vectors using polyethylenimine (PEI). After  
730 16 hours, media was removed and replaced with serum-free media. After 3-4 days, supernatants  
731 were harvested and cell debris was removed by centrifugation at max speed in a microcentrifuge

732 for 1 minute. For large scale transfections, expression vectors containing paired heavy and light  
733 chains were transiently transfected into 293T cells using polyethylenimine (PEI). Expression of  
734 recombinant full-length human IgG monoclonal antibodies were carried out in serum-free basal  
735 medium (Nutridoma-SP, Sigma-Aldrich). Four days after transfection, cell culture medium was  
736 collected and protein was purified using HiTrap<sup>TM</sup> Protein G HP column (1ml, GE Healthcare).  
737 Final IgG proteins were concentrated and buffer exchanged into 1x PBS using Millipore  
738 concentrator (30K MWCO). IgG protein concentration is determined by Nanodrop 2000  
739 spectrophotometer.

740

#### 741 **Statistics**

742 Statistics used are described in figure legends and were determined using Prism (Graphpad). All  
743 measurements within a group in a panel are from distinct samples except technical replicates used  
744 in ELISAs as described. Statistical significance of all pairwise comparisons was assessed by two-  
745 tailed nonparametric tests; Mann-Whitney for unpaired data and Wilcoxon signed rank tests for  
746 paired data unless otherwise noted. No multiple hypothesis testing was applied and exact p-values  
747 are displayed.

748

#### 749 **Data Availability:**

750 All data generated or analysed during this study are included in this published article (and its  
751 supplementary information files) or available from the corresponding author upon reasonable  
752 request with the exception of a few blood draw samples that were used up in this study.

753

#### 754 **Acknowledgements:**



755 We thank David M. Koelle for PBMC samples used for reagent testing, Florian Krammer for  
756 vectors used to express the SARS-CoV-2 S RBD, Wesley C. Van Voorhis for historical negative  
757 serum samples, Ben Murrell and the CoroNAb consortium for providing the Ty1 antibody, Ali  
758 Ellebedy for providing the BO4 and CO2 antibodies, Mike Murphy and Deleah Pettie for  
759 assistance with protein production, the Benaroya Research Institute biorepository for historical  
760 negative PBMC samples, Noah Simon for assistance with statistical analyses, Makala Hale for  
761 help with BCR sequencing, Brian Hondowicz for technical help, the Pepper, Gale, Campbell,  
762 Rawlings and Hammerman labs for helpful discussion and the study volunteers for their  
763 participation. This work was supported by the following funding: L.B.R and L.S (NIH2T32  
764 AI106677), D.J.C. and P.M. (NIH R01AI127726, NIH U19AI125378-S1), J.A.H. (NIH  
765 R01AI150178-01S1), H.R.W. (NIH TL1 TR002318), D.R. (SCRI, Research Integration Hub  
766 Covid-19 Award), M.P. (NIH U01AI142001-02S1; R01AI118803); a Bill & Melinda Gates  
767 Foundation grant to N.P.K. (OPP1156262); BWF #1018486 and COVID Pilot grant to M.P.;;  
768 Emergent Ventures Fast Grant to M.P.

769

770 **Author contributions:**

771 M.P., L.B.R. and J.N. conceived the study. K.K.T. assisted in cohort recruitment and visit  
772 scheduling. J.R., C.S., E.A.H., L.B.R, J.N. and K.K.T. processed and preserved blood and serum  
773 samples. J.N., L.C., and N.P.K. generated proteins and L.B.R. generated and validated tetramer  
774 reagents. L.S., J.N. and L.B.R performed ELISAs and L.S. and J.N performed sVNT assays. L.S.  
775 analyzed serum data. H.R.W. and J.H. conceived, performed and analyzed innate cell phenotyping  
776 experiments. L.B.R. and J.N. performed and analyzed antigen-specific B cell flow cytometry and  
777 sorting. K.B.P. and P.M. conceived, performed and analyzed T cell experiments. C.T. sequenced

778 and generated mAb plasmids. Y.C. expressed and purified mAbs. J.E. and E.A.H. performed PRNT  
779 assays. L.B.R., J.N., L.S., K.B.P., P.M. and M.P. drafted the manuscript. All authors helped edit  
780 the manuscript. M.P. secured funds and supervised the project.

781

782 **Competing Interests:**

783 M.P., D.R., J.N., C.T., Y.C. and L.B.R. have filed a patent under the provisional serial no.  
784 63/063,841. Other authors declare no competing interests.

785

786 **Additional Information**

787

788 **Correspondence and requests for materials** should be addressed to M.P.

789 **Supplementary Information** is available for this paper.

790 **Extended Data Figure/Table Legends:**

791

792 **Extended Data Table 1. Study cohort characteristics.**

793

794 **Extended Data Figure 1. Healthy controls do not have SARS-CoV-2 RBD or spike-specific**  
795 **antibodies.**

796 ELISA dilution curves and AUC for anti-RBD **a)** and anti-spike **b)** IgG (left) and IgM (right) in  
797 plasma collected prior to the SARS-CoV-2 pandemic (historical negatives, HN, black), during the  
798 pandemic (healthy controls, HC, red, at Visit 2), and from individuals previously found PCR  
799 positive for SARS-CoV-2 (CoV2<sup>+</sup>, blue, at Visit 1). Dashed line indicates mean + 3 SD of HN  
800 AUC values. Statistical significance determined by two-tailed Mann-Whitney tests. Error bars  
801 represent mean and SD (HN n=5, HC n=14, IgG CoV2<sup>+</sup> n=1, IgM CoV2<sup>+</sup> n=1).

802

803 **Extended Data Figure 2. PBMC innate populations in CoV2<sup>+</sup> and HC individuals are not**  
804 **different at Visit 1.**

805 **a)** Flow cytometry gating for CD15<sup>-</sup>CD3<sup>-</sup>CD19<sup>-</sup>CD56<sup>-</sup>HLADR<sup>+</sup>CD14<sup>+</sup> monocytes (purple gate),  
806 which were further divided into CD14<sup>lo</sup>CD16<sup>+</sup> (red gate), CD14<sup>+</sup>CD16<sup>+</sup> (blue gate), and  
807 CD14<sup>+</sup>CD16<sup>-</sup> monocytes (green gate), and CD15<sup>-</sup>CD3<sup>-</sup>CD19<sup>-</sup>CD56<sup>-</sup>CD14<sup>-</sup>CD304<sup>+</sup>CD123<sup>+</sup>  
808 plasmacytoid dendritic cells (pDCs) (pink gate). **b)** Percent monocytes and **c)** pDCs of live PBMCs  
809 and **d-f)** percent monocyte subsets of monocytes in PBMCs from healthy controls (HC) and  
810 previously SARS-CoV-2 infected (CoV2<sup>+</sup>) individuals. Statistical significance determined by two-  
811 tailed Mann-Whitney tests. Error bars represent mean and SD (HC n=15, CoV2<sup>+</sup> n=14, 2  
812 experiments).

813

814 **Extended Data Figure 3. Bulk PBMC T Cells return to immune quiescence by Visit 1.**

815 **a)** Representative flow cytometry plots and **b)** frequencies of  $\alpha\beta$  and  $\gamma\delta$  T cell subsets at Visit 1  
816 (V1) in PBMCs from historical negative (HN), healthy control (HC) and SARS-CoV-2-recovered  
817 (CoV2<sup>+</sup>) PBMCs. **c)** Representative flow cytometry plots and **d)** frequencies of CD4<sup>+</sup> and CD8<sup>+</sup> T  
818 Cell effector/activation states of total non-naive, memory CD4<sup>+</sup> or CD8<sup>+</sup> T Cells  
819 (CD45RA<sup>+</sup>CCR7<sup>+/-</sup>) at V1 in HC and CoV2<sup>+</sup> PBMCs. **e)** Representative flow cytometry plots and  
820 **f)** frequencies of CD4<sup>+</sup> memory and T-helper subsets at V1 in HN/HC and CoV2<sup>+</sup> PBMCs. **g)**  
821 Representative flow cytometry plots and **h)** frequencies of cTfh (CXCR5<sup>+</sup>CD45RA<sup>-</sup>) and cTfh  
822 activation (ICOS<sup>+</sup>PD-1<sup>+</sup>) and helper (CXCR3<sup>+/-</sup>CCR6<sup>+/-</sup>) subsets at V1 in HC and CoV2<sup>+</sup> PBMCs.  
823 Statistical significance determined by two-tailed Mann-Whitney tests. Error bars represent mean  
824 and SD (HN n=6, HC n=15, CoV2<sup>+</sup> n=14, 2 experiments).

825

826 **Extended Data Figure 4. PBMC B Cell and antibody response at two memory time points.**

827 **a)** Frequency of plasmablasts (PBs, CD20<sup>-</sup>CD38<sup>hi</sup>) of live, CD3<sup>-</sup>CD14<sup>-</sup>CD16<sup>-</sup> PBMCs and **b)**  
828 cycling cells (Ki67<sup>+</sup>) and **c)** T-bet<sup>+</sup> cells of live, CD3<sup>-</sup>CD14<sup>-</sup>CD16<sup>-</sup>CD20<sup>+</sup> PBMCs from healthy  
829 control (HC) and SARS-CoV-2-recovered (CoV2<sup>+</sup>) individuals at Visit 1 (V1) and Visit 2 (V2)  
830 (HN n=14, V1 HC n=15, V2 HC n=14 (PB) n=15 (Ki67, T-bet) , V1 CoV2<sup>+</sup> n=14, V2 CoV2<sup>+</sup>  
831 n=14, 2 experiments). **d)** ELISA dilution curves and AUC for anti-spike IgG (left), IgM (center),  
832 and IgA (right) from HC and CoV2<sup>+</sup> plasma at V1. Dashed line indicates 3 mean + 3 SD of the  
833 HC AUC values. Each symbol is a different individual and is consistent in d), f) and h) (HC n=15,  
834 CoV2<sup>+</sup> n=15). **e)** Spearman correlation of V1 anti-RBD and anti-spike IgG (left), IgM (center),  
835 and IgA (right) AUC (HC n=15, CoV2<sup>+</sup> n=15). **f)** V2 HC AUC values and **g)** RBD inhibition at

836 1:10 plasma dilution were normalized to V1 CoV2<sup>+</sup> samples run with V2 samples and value for  
837 each HC individual from V1 and V2 are paired (V1 HC n=12, V2 HC n=12). **h)** Percent  
838 neutralization dilutions curves determined by PRNT for CoV2<sup>+</sup> and HC samples (V1 HC n=2, V1  
839 CoV2<sup>+</sup> n=15, V2 HC n=2, V2 CoV2<sup>+</sup> n=14). Statistical significance for unpaired data determined  
840 by two-tailed Mann-Whitney tests and, for paired data, by two-tailed Wilcoxon signed-rank tests.  
841 Error bars represent mean and SD.

842

### 843 **Extended Data Figure 5. Detecting SARS-CoV-2 RBD-specific B cells in PBMCs.**

844 **a,b)** SARS-CoV-2 RBD tetramer detected increased numbers of RBD-specific B cells (Live, CD4<sup>+</sup>  
845 CD8<sup>-</sup>B220<sup>+</sup> and CD138<sup>+</sup>B220<sup>-</sup>RBD tetramer<sup>+</sup>Decoy<sup>-</sup>) which had increased frequencies of germinal  
846 center B cells (GCB, GL7<sup>+</sup>CD138<sup>-</sup>) and plasmablasts (PB, CD138<sup>+</sup>GL7<sup>-</sup>) in popliteal lymph nodes  
847 from mice 7-10 days post-immunization with RBD/CFA compared naive (n=3 mice/treatment in  
848 3 experiments). **c)** Representative flow cytometry gates for phenotyping in Figure 2 set on total B  
849 cells from healthy controls (HC) and SARS-CoV-2-recovered (CoV2<sup>+</sup>) in two panels (surface, top;  
850 intracellular, bottom). **d)** Left, frequencies of RBD-specific B cells with naive (CD21<sup>+</sup>CD27<sup>-</sup>) and  
851 memory (CD21<sup>+</sup>CD27<sup>+</sup>/CD21<sup>-</sup>CD27<sup>+</sup>/CD21<sup>-</sup>CD27<sup>-</sup>) phenotypes from HC and CoV2<sup>+</sup> PBMCs at  
852 Visit 1 (V1) and Visit 2 (V2). Right, frequency of MBCs (populations outlined in red). **e)** Number  
853 of cycling (Ki67<sup>+</sup>) RBD-specific MBCs (HN n=14, V1 HC n=12, V2 HC n=13, V1 CoV2<sup>+</sup> n=15,  
854 V2 CoV2<sup>+</sup> n=14). Frequency of RBD-specific MBCs expressing **f)** indicated BCR isotype (HN  
855 n=14, V1 HC n=12, V2 HC n=13, V1 CoV2<sup>+</sup> n=15, V2 CoV2<sup>+</sup> n=14) or **g)** T-bet. Number of **h)**  
856 resting (T-bet<sup>lo</sup>) and **i)** recently activated (T-bet<sup>hi</sup>) RBD-specific MBCs. Statistical significance for  
857 unpaired data determined by two-tailed Mann-Whitney tests and, for paired data, by two-tailed

858 Wilcoxon signed-rank tests. Error bars represent mean and SD (HN n=14, V1 HC n=15, V2 HC  
859 n=15, V1 CoV2<sup>+</sup> n=15, V2 CoV2<sup>+</sup> n=14, unless otherwise noted, 2 experiments).

860

861 **Extended Data Figure 6. Bulk CD4 and CD8<sup>+</sup> T cell cytokines expression.**

862 **a)** Representative cytokine gating on CD69<sup>+</sup>ICOS<sup>+</sup> CD4<sup>+</sup> T Cells from PMA/Ionomycin -activated  
863 CD4<sup>+</sup> cTfh (CXCR5<sup>+</sup>) and non-cTfh (CXCR5<sup>-</sup>) T Cells. **b)** Sorting strategy and **c)** frequency of  
864 proliferated (CXCR3<sup>+</sup>CPD<sup>lo</sup>) naive, T central memory (T<sub>CM</sub>), and T effector memory (T<sub>EM</sub>) cells  
865 from HC and CoV2<sup>+</sup> PBMCs at Visit 1 and Visit 2 after 5-6 days of culture with autologous  
866 monocytes and SARS-CoV-2 spike protein or vehicle (V1 HC n=3, V2 HC n=4, V1 CoV2<sup>+</sup> n=3,  
867 V2 CoV2<sup>+</sup> n=4). **d)** Representative flow cytometry plots of cytokine expression from  
868 PMA/Ionomycin-activated CD8<sup>+</sup> T cells (HN n=6, HC n=15, CoV2<sup>+</sup> n=14). Statistical significance  
869 for unpaired data determined by two-tailed Mann-Whitney tests and, for paired data, by two-tailed  
870 Wilcoxon signed-rank tests. Error bars represent mean and SD (2 experiments).

871

872 **Extended Data Figure 7. Generation of neutralizing antibodies by RBD-specific MBCs.**

873 **a)** Gating strategy for sorting RBD-specific B cells. **b)** IgG ELISA to confirm expression of  
874 antibodies in transfected cell culture supernatants. **c)** RBD ELISA of purified monoclonal  
875 antibodies. Negative control is an irrelevant *Plasmodium*-specific antibody.

876

877 **Extended Data Table 2. RBD-specific MBC-derived antibody amino acid sequences.**

**Extended Data Table 1: Study cohort characteristics**

|                                                          | <b>Previously SARS-CoV-2 Infected (CoV2<sup>+</sup>)</b> | <b>Healthy Controls (HC)</b> | <b>Historical Negatives (HN)</b> |
|----------------------------------------------------------|----------------------------------------------------------|------------------------------|----------------------------------|
| Number of participants <sup>1</sup>                      | 15                                                       | 17                           | 14                               |
| Age (years)                                              | 47 (28 – 71)                                             | 42 (24 – 57)                 | 47.5 (27 – 72)                   |
| Sex                                                      | 27% Male, 73% Female                                     | 47% Male, 53% Female         | 21% Male, 79% Female             |
| Number of symptoms <sup>2,3</sup>                        | 5 (1 – 7)                                                | NA                           | ND                               |
| Symptom duration (days)                                  | 13 (2 – 31)                                              | NA                           | ND                               |
| Time from symptom onset to Visit 1 (days)                | 35.5 (19 – 44)                                           | NA                           | NA                               |
| Time from symptom onset to Visit 2 (days)                | 86 (73 – 110)                                            | NA                           | NA                               |
| Time from SARS-CoV-2 positive PCR test to Visit 1 (days) | 28 (20 – 35)                                             | NA                           | NA                               |
| Time from SARS-CoV-2 positive PCR test to Visit 2 (days) | 77.5 (64 – 97)                                           | NA                           | NA                               |
| Time from Visit 1 to Visit 2 (days)                      | 46 (39 – 69)                                             | 47 (40 – 61)                 | NA                               |
| Year samples drawn                                       | 2020                                                     | 2020                         | 2016 – 2019                      |

<sup>1</sup> Blood drawn from 14 CoV2<sup>+</sup> and 13 HC at Visit 1 and Visit 2. 1 CoV2<sup>+</sup> and 2 HC were only drawn with Visit 1. 2 HC were only drawn with Visit 2.

<sup>2</sup> All CoV2<sup>+</sup> individuals reported symptoms. 9 HCs reported symptoms and 2 HC had negative SARSCoV-2 PCR results.

<sup>3</sup> The symptoms surveyed were fever, chills, cough, runny nose, fatigue, muscle ache and difficulty breathing.

Previously SARS-CoV-2 infected (CoV2<sup>+</sup>) and healthy control (HC) volunteers were consented and enrolled for this study. Values are reported as the median with the range in parentheses. ND = No data, NA = Not applicable.

## Extended Data Figure 1

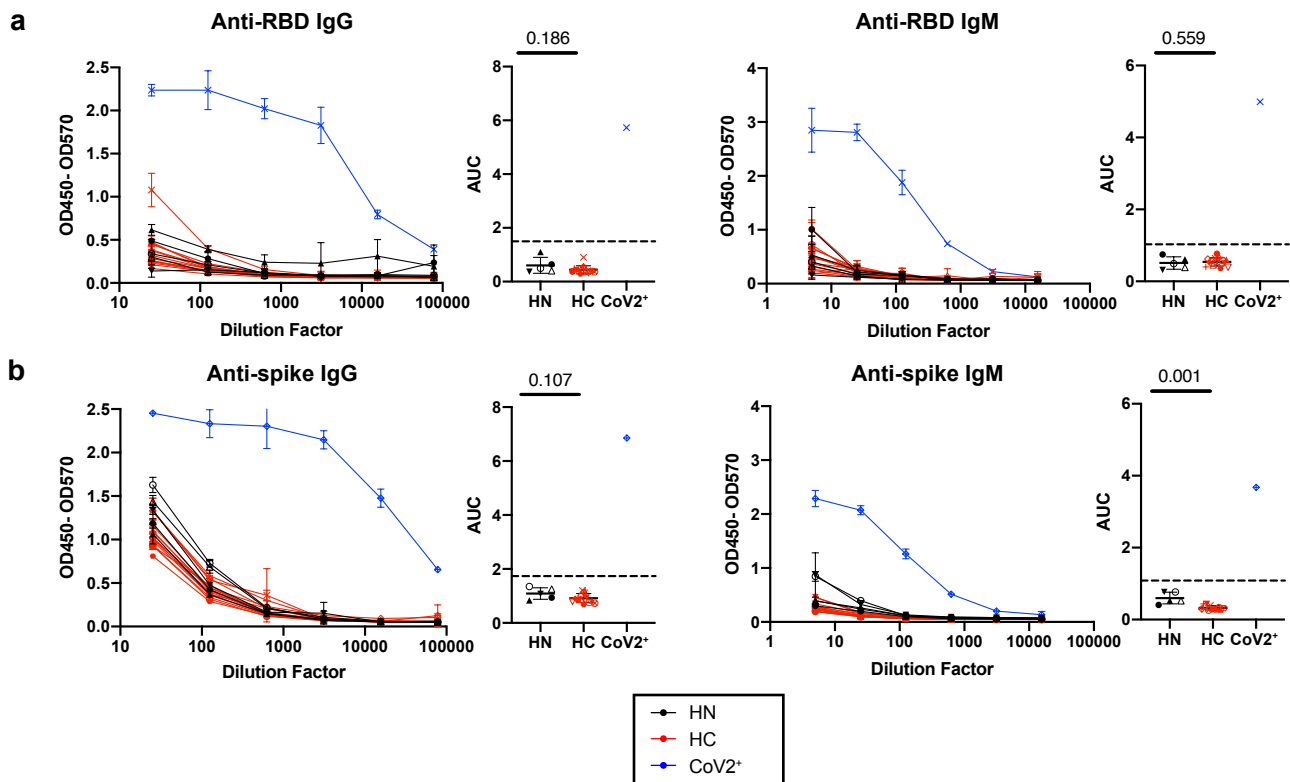



## Extended Data Figure 2

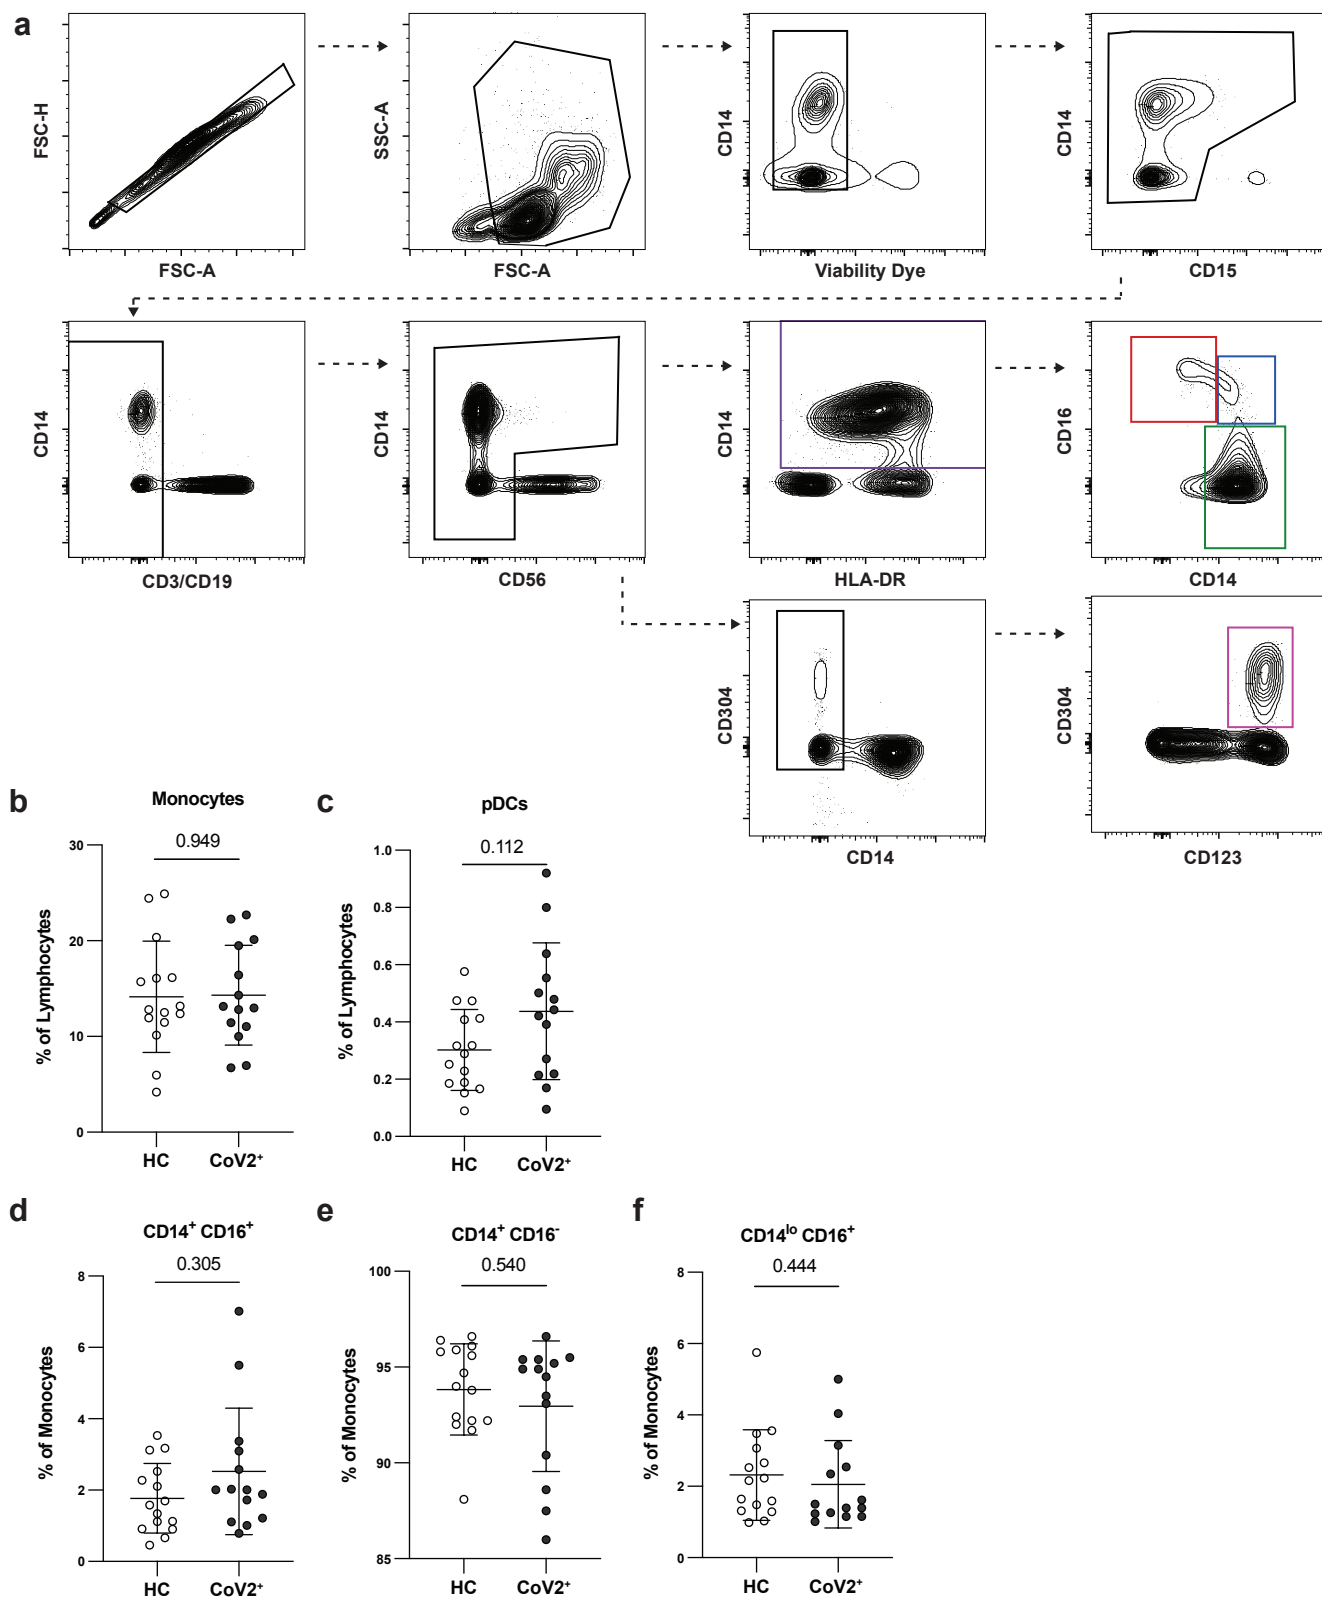

### Extended Data Figure 3

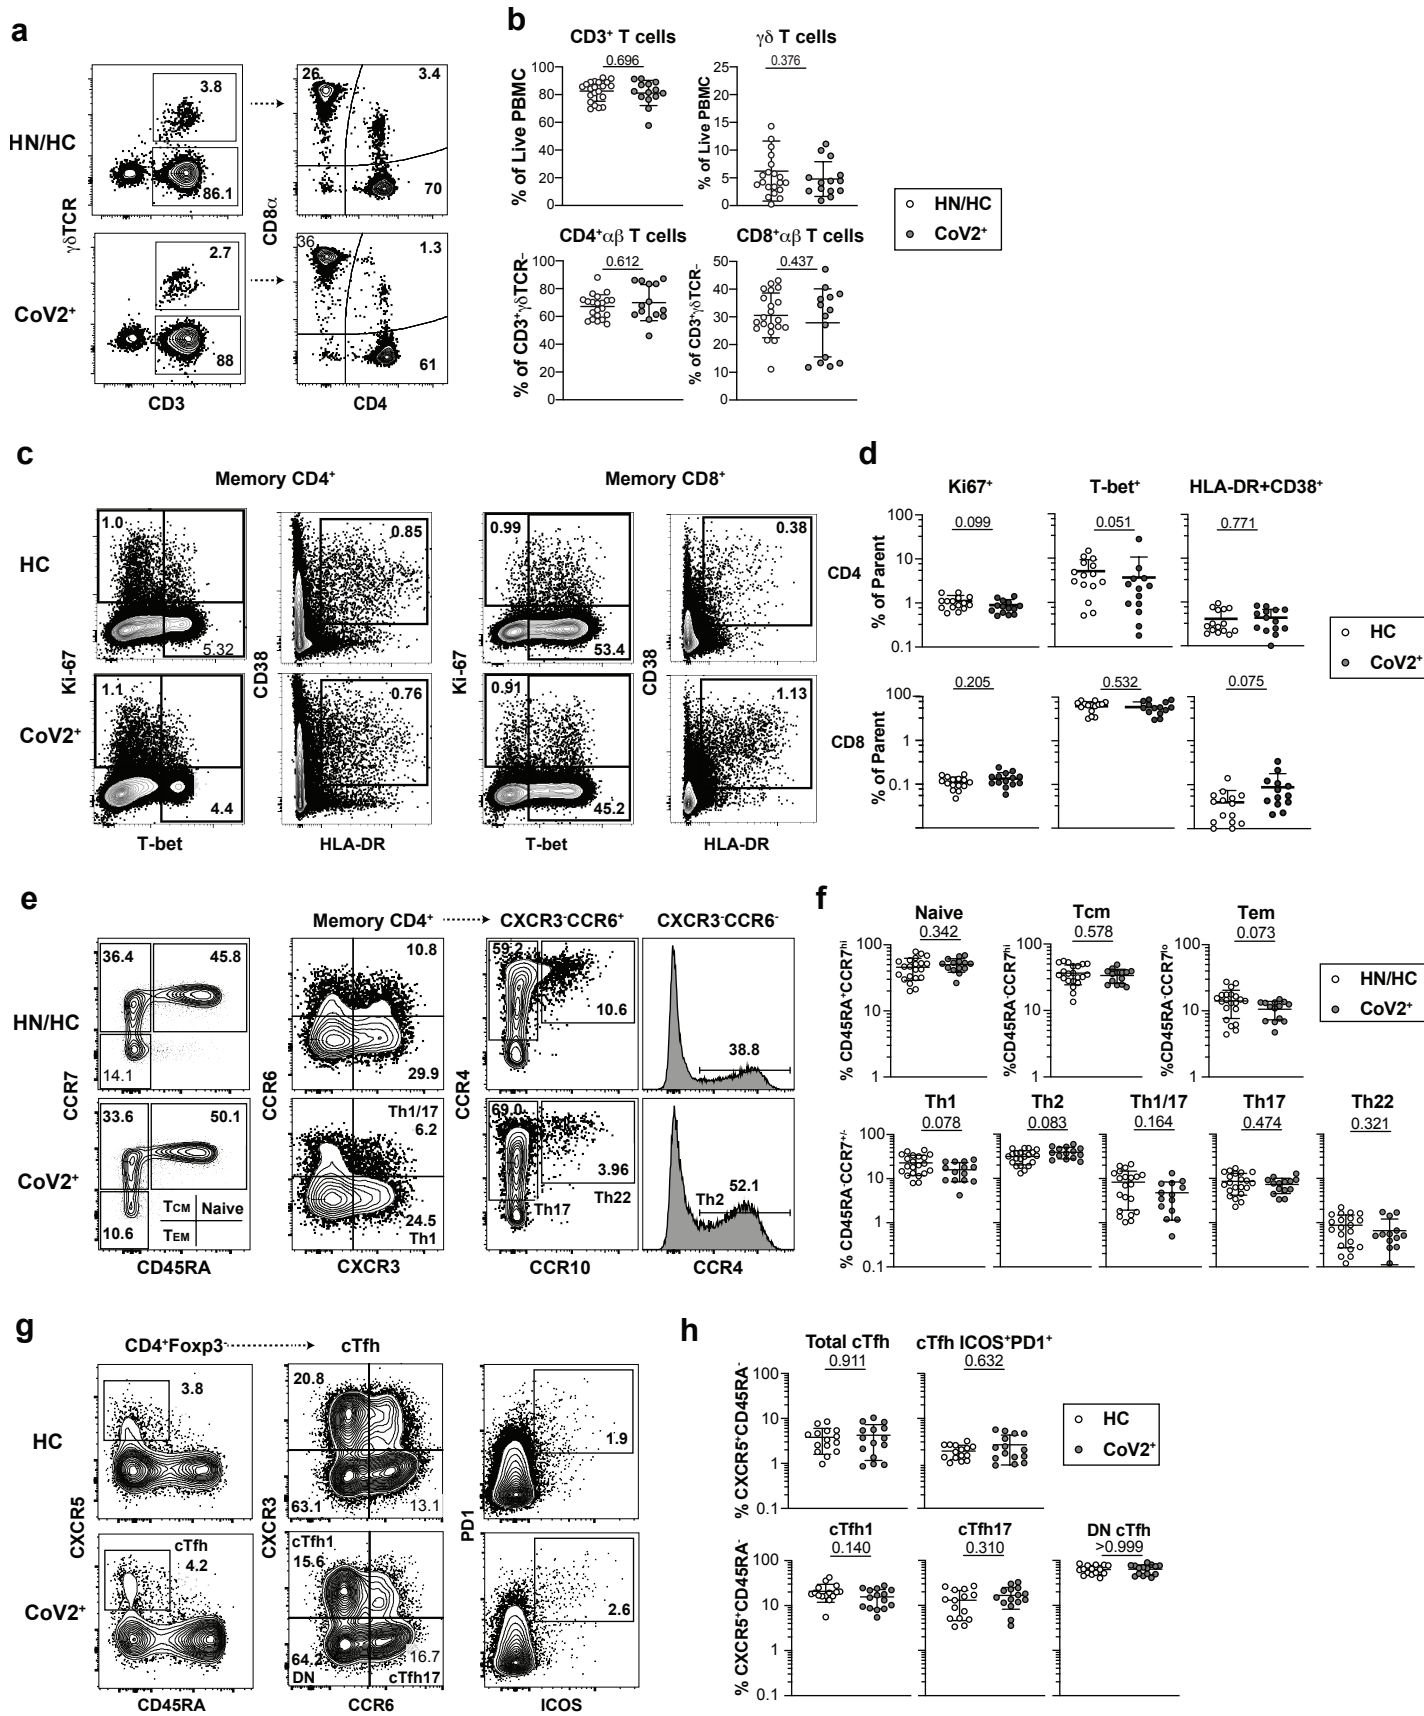

## Extended Data Figure 4

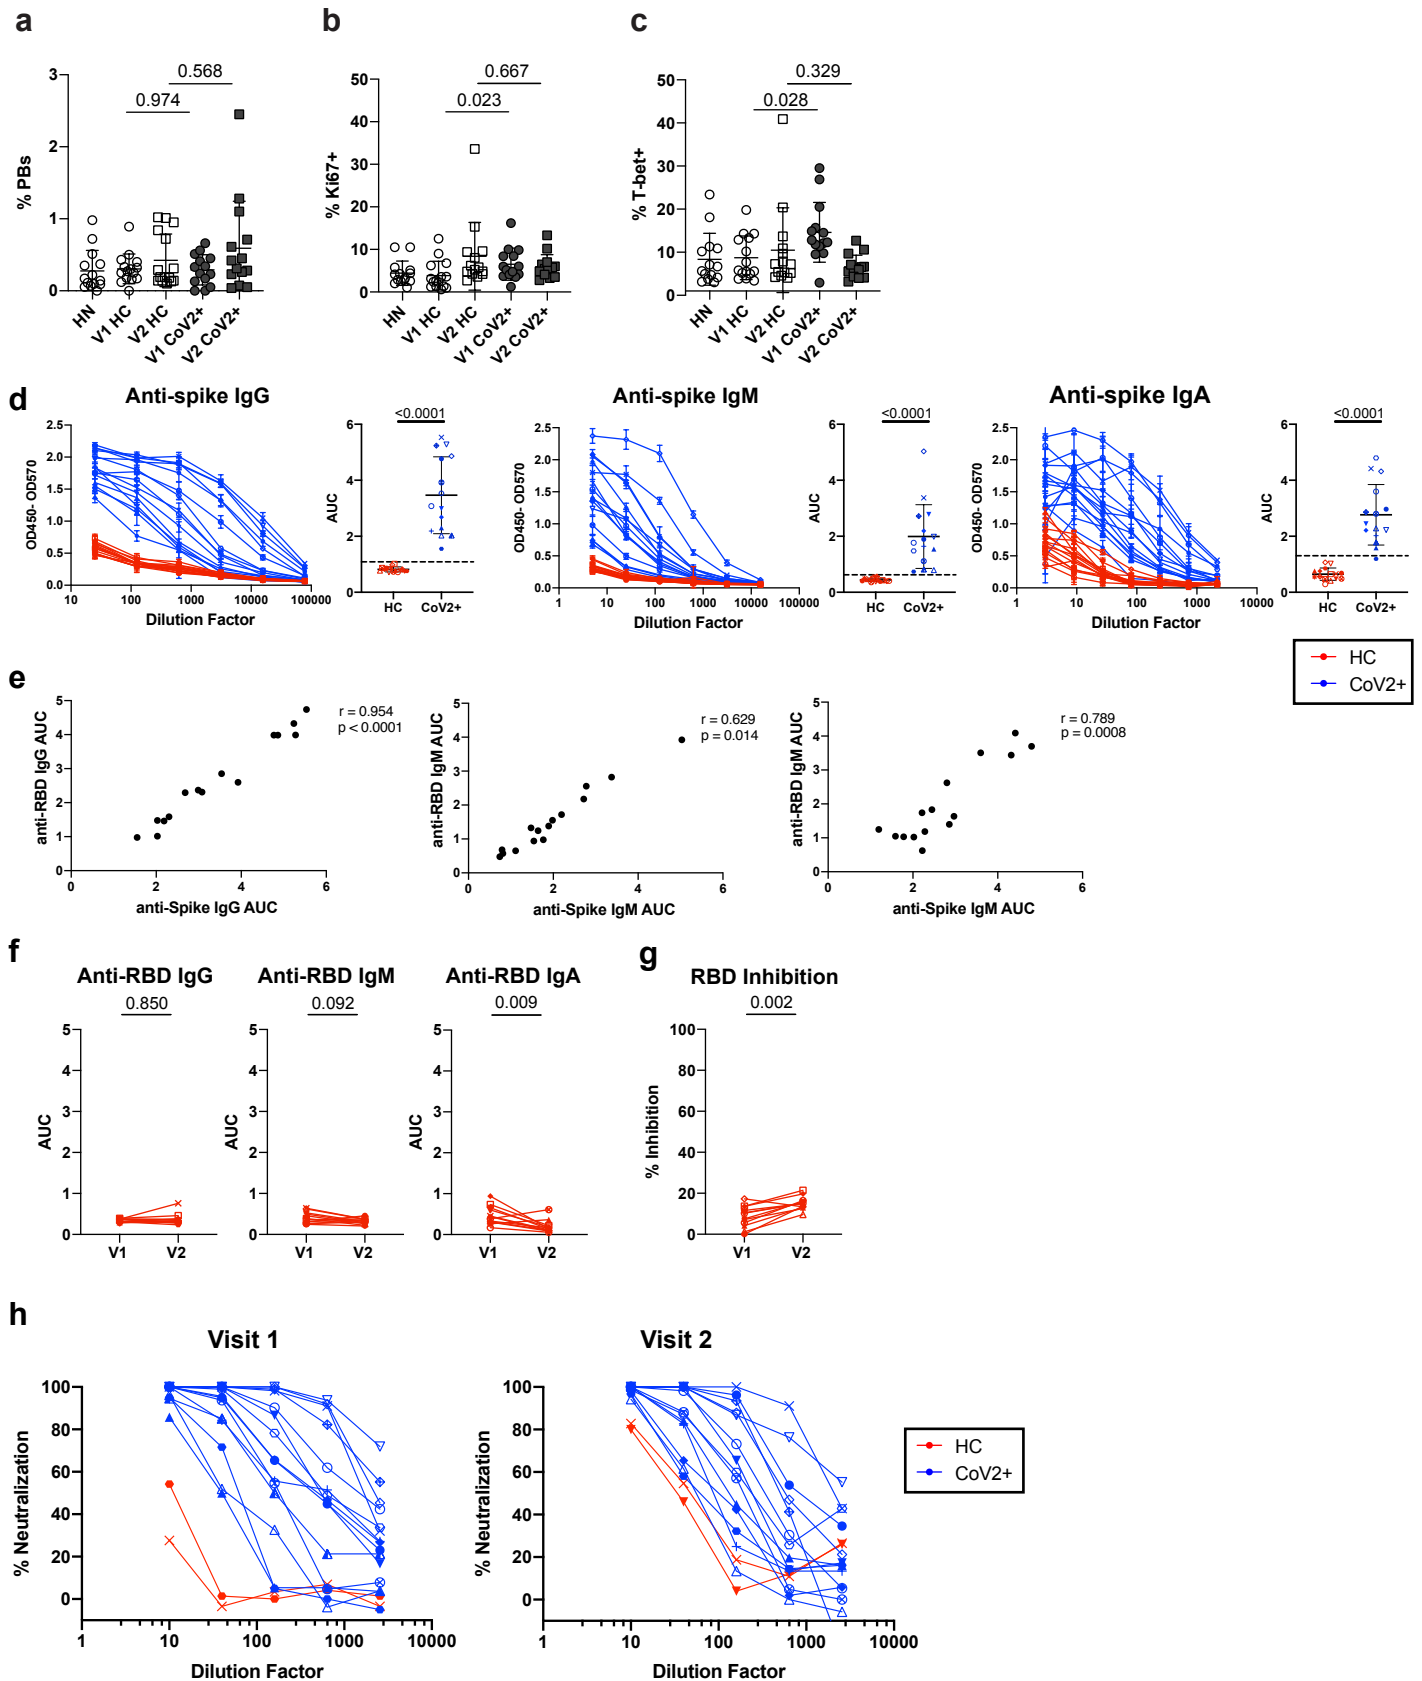

## Extended Data Figure 5

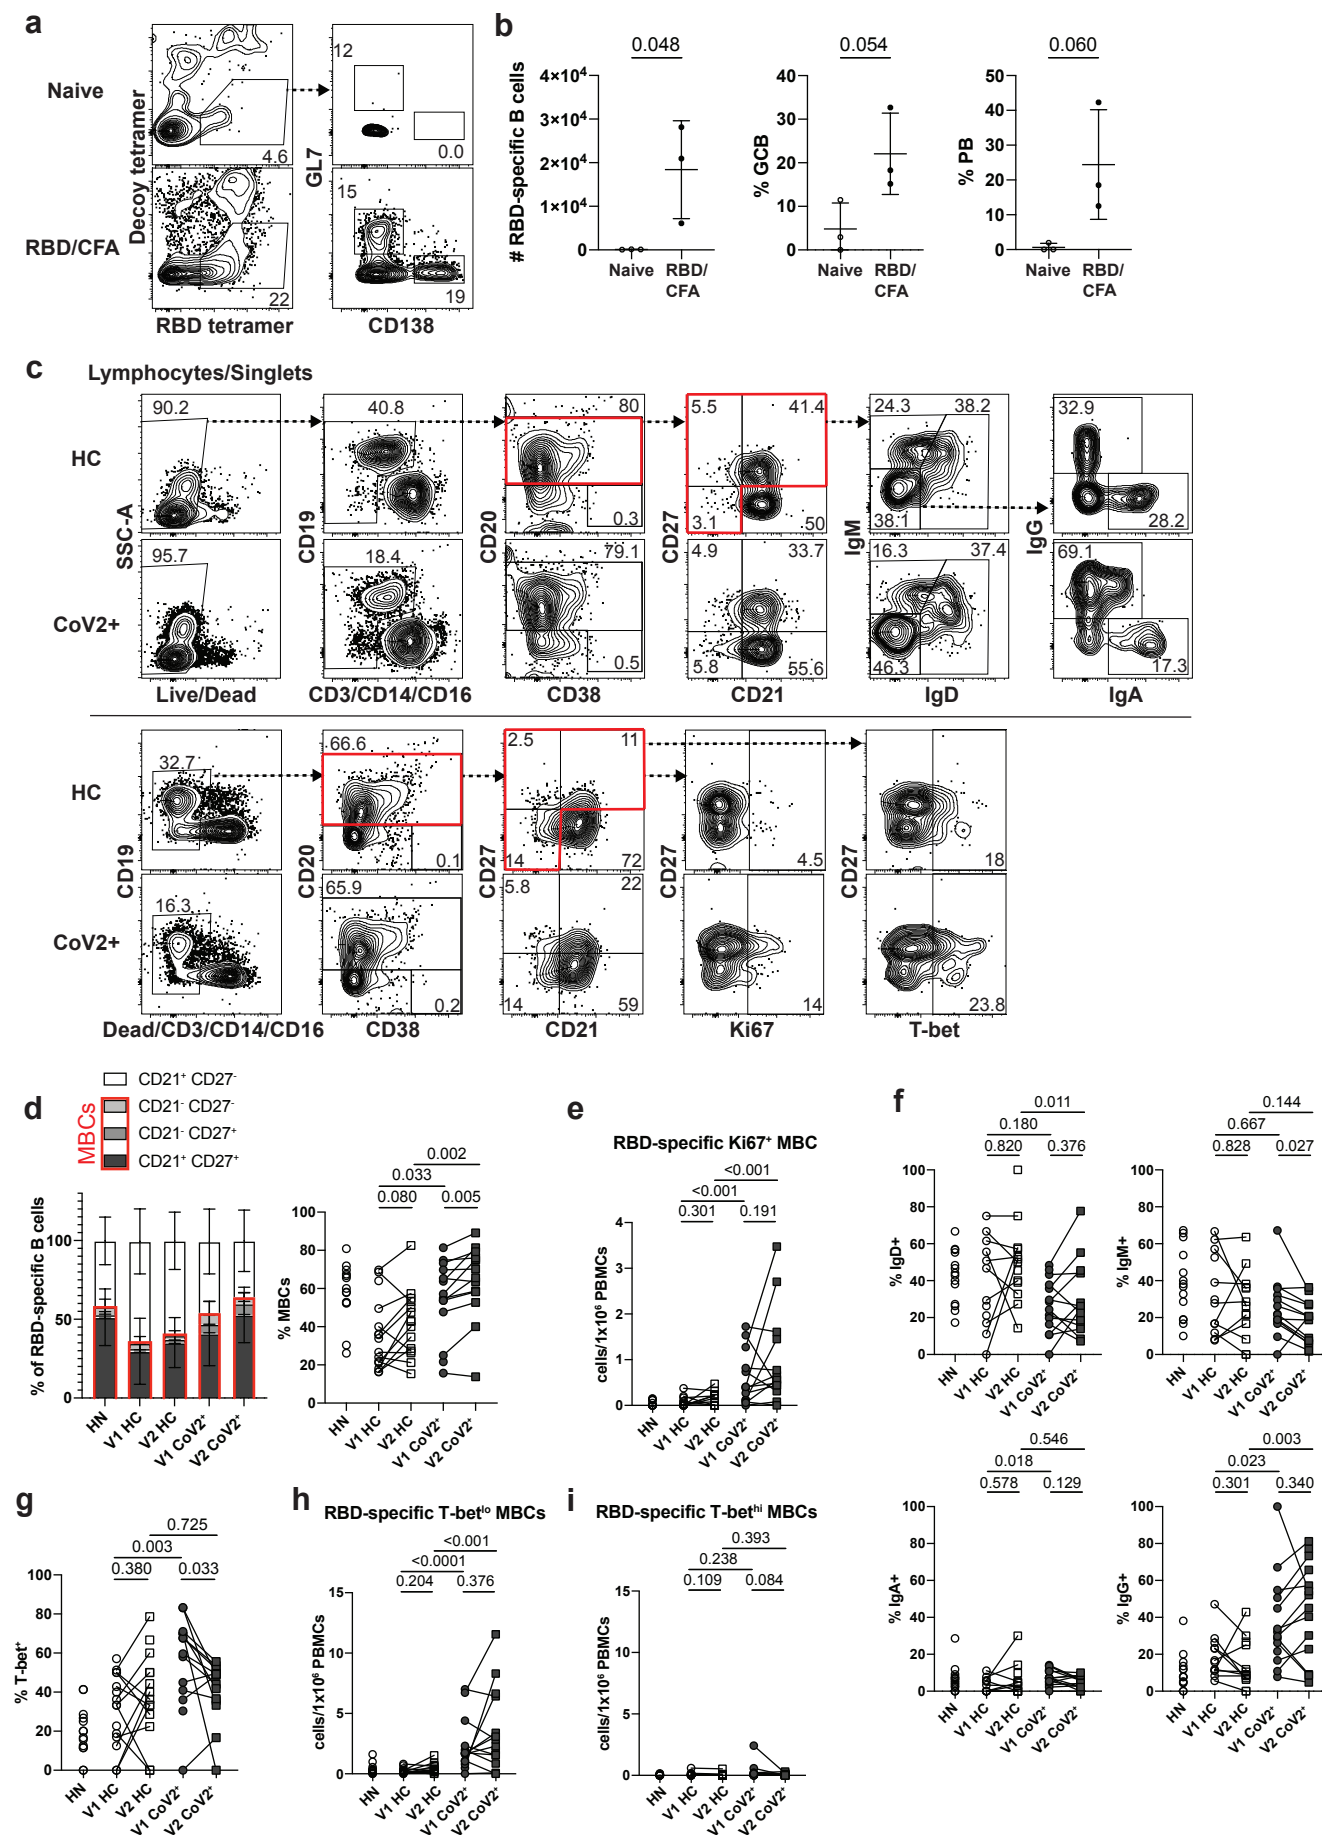

## Extended Data Figure 6

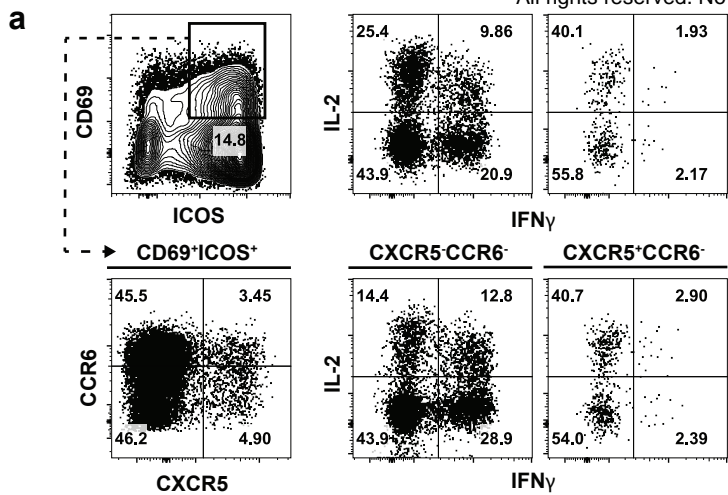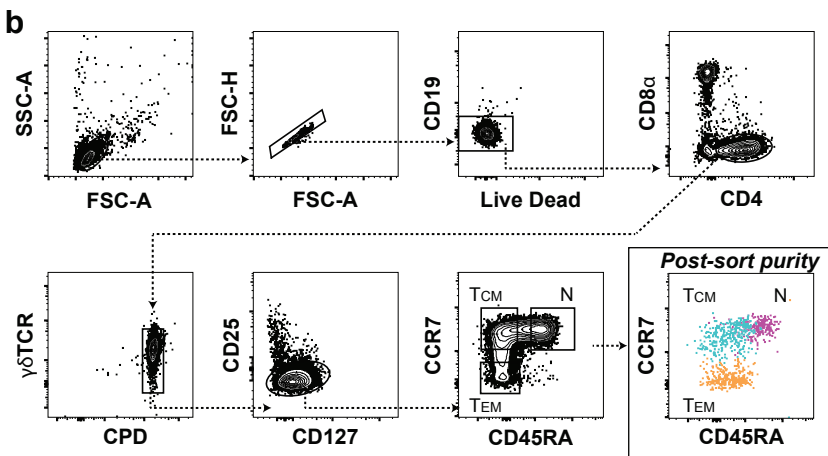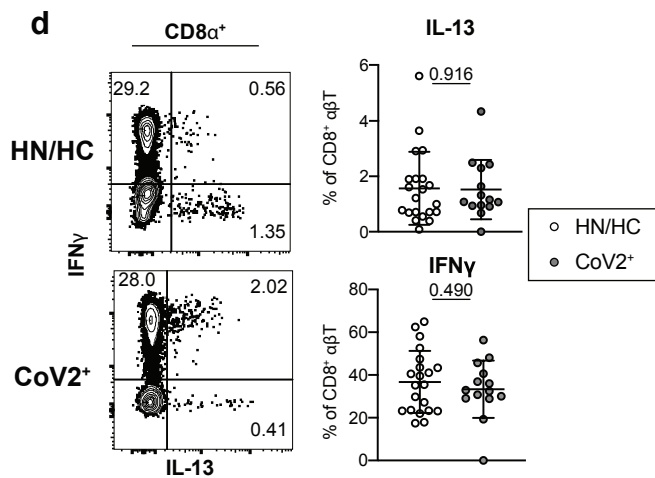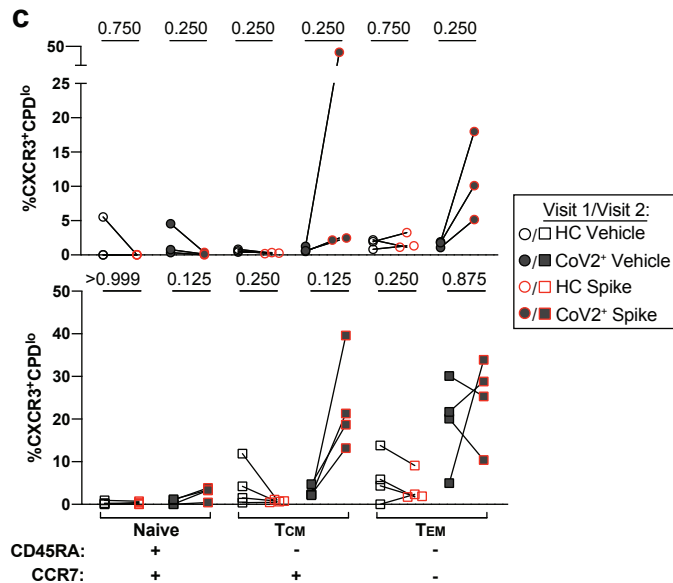

## Extended Data Figure 7

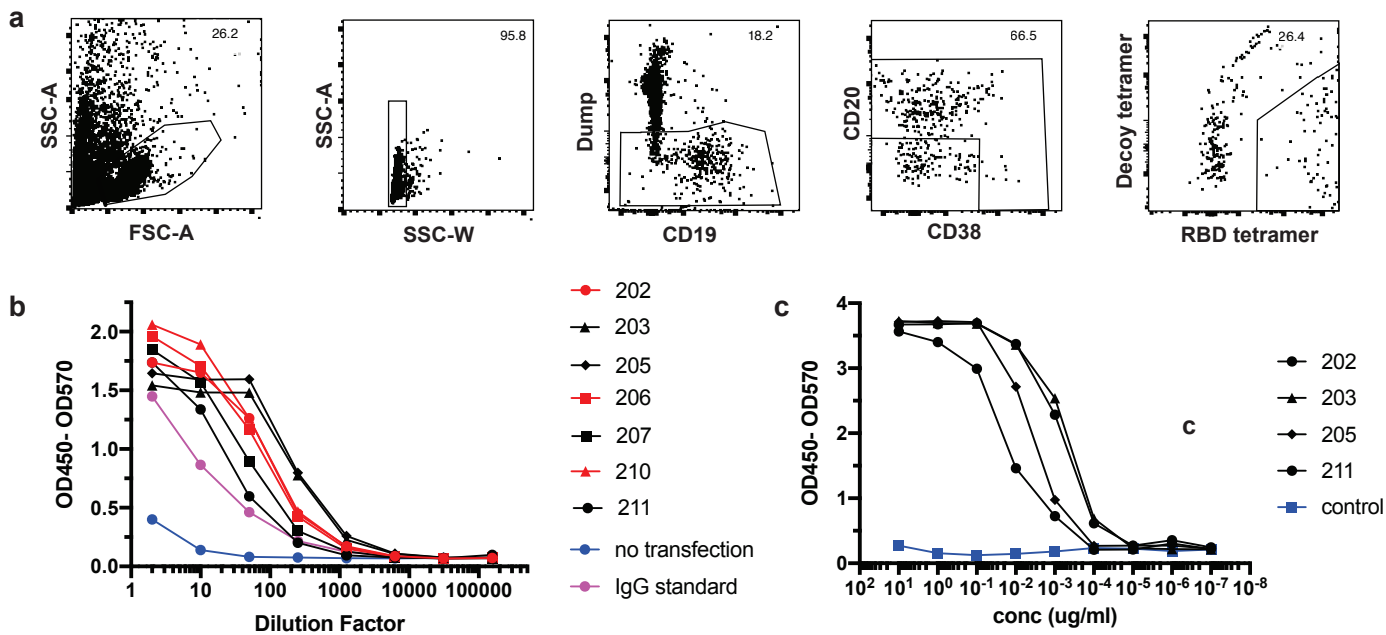

**Extended Data Table 2.**

| mAb ID | Chain  | AA Sequence                                                                                                                             |
|--------|--------|-----------------------------------------------------------------------------------------------------------------------------------------|
| 202    | Heavy  | EVQLVESGGGLVQPGGSLRLSCAASEITVSSNYMSWVRQAPGKGLEWWSLIYSGGS<br>TFYADSVKGRFIISRDNKNTLYLQMNSLRAEDTAVYHCARGGEEPLPFDPWGQGLTV<br>TVSS           |
| 202    | Lambda | QSVLTQPPSVSGAPGQRVTISCTGSSSNIGAGYDVHWYQQLPGTAPKLLIYGNSNRP<br>SGVPDRFSGSKSGTSASLAITGLQAEDEADYYCQSYDSSLVSVVFGGGTKLTVL                     |
| 203    | Heavy  | QVQLVQSGAEVKKPGSSVKV/SCKASGGTFSSYPISWVRQAPGQGLEWMGRIIPILRV<br>ANFAQRFEGRVITADKSTGTAYMELSSLRSEDTAMYCARDEAQTNTNWFDPWG<br>QGLTVTVSS        |
| 203    | Lambda | QSVLTQPPSVSGAPGQRVIISCTGSNSNIGAGYDVHWYQQLPGTAPKLLIYGNNRPS<br>GVPDRFSGSKSGTSASLAITGLQAEEDGADYYCQSYDSSLSDVVFGGGTKLTVL                     |
| 205    | Heavy  | QVQLQESGPGLVKPSSETLSLTCTVSGGSVSSGSYYWSWIRQPPGKGLEWIGYIYYSG<br>STNYPNPSLKSRTISVDTSKNQFSLKLSVTAADTAVYYCARVPRFISDWYPFYSIDYW<br>GQGTLTVTVSS |
| 205    | Lambda | QSALTQPPSASGSPGQSVTISCTGTSSDIGGYNVSWYQQHPGKAPKLMIEVSKRP<br>SGVPDRFSGSKSGNTASLTVSGLQAEDEADYYCSSYAGSTVLFGGGTKLTVL                         |
| 206    | Heavy  | EVQLVESGGGLVQPGGSLRLSCAVSGFTVSSNYMSWVRQAPGKGLEWWSVIYTG<br>GTYADSVKGRFTISRDNKNTLYLQMNTLRAEDTTVYYCARGDGSYYRAFDYWGQ<br>TLTVTVSS            |
| 206    | Kappa  | DIQMTQSPSSLSASVGDRTITCRASQSSISNYLNWYHQKPGKAPKLLIYAASSLQSGV<br>PSRFSGSGSGTDFTLTISSLQPEDFATYYCQQSYSPPTFGPGTKVEIK                          |
| 207    | Heavy  | EVQLVESGGGLVQPGGSLRLSCAASGFTFSSYAMSWVRQAPGKGLEWWSAISGSGD<br>STYHADSVKGRFTISRDNKNTLYLQMNSLRAEDTAVYYCAKDPGTVTTYEYFQHWG<br>QGLTVTVSS       |
| 207    | Lambda | SYVLTQPPSVSVAPGKTARITCGGNNIGSKSVHWYQQRPGHAPVLVIYYDSDRPSGIP<br>ERFSGNSGNTATLTISRVEAGDEADYYCQVWDGSSDHPGMVFGGGTKLTVL                       |
| 210    | Heavy  | EVQLVESGGGLIQPGGSLRLSCAASGFTVSRNYMNWVRQAPGKGLEWWSVIYSGGS<br>TFYADSVKGRFTISRDNKNTLYLQMNSLRAEDTAVYYCARDASSYIDWGQGLTVTV<br>SS              |
| 210    | Kappa  | DIQMTQSPSSLSASVGDRTITCRASQSISSYLNWYQQKPGKAPKLLIYASSSLQRGV<br>PSRFSGSGSGTDFTLTISSLQPEDFATYYCQQSYSTPITFGQGRLEIK                           |
| 211    | Heavy  | QVQLQESGPGLVKPSSETLSLTCTVSGGSISSYYWSWIRQPPGKGLEWIGYIYYS<br>GSTNYPNPSLKSRTISVDTSKNQFSLKLSVTAADTAVYYCAGDFWSPDPSYYYGMDVW<br>GQGTTVTVSS     |
| 211    | Kappa  | DIQMTQSPSSVSASVGDRTITCRASQGISSWLAWYQQKPGKAPKLLIYAASLQSGV<br>PSRFSGSGSGTDFTLTISSLQPEDFATYYCQQANSFPRTFGQGRLEIK                            |

**Extended Data Table 2.** Amino acid sequence of monoclonal antibody variable regions.
